# Genome-wide characterization of satellite DNA arrays in a complex plant genome using nanopore reads

by

Tihana Vondrak<sup>1,2</sup>, Laura Ávila Robledillo<sup>1,2</sup>, Petr Novák<sup>1</sup>, Andrea Koblížková<sup>1</sup>, Pavel Neumann<sup>1</sup>  
and Jiří Macas<sup>1,\*</sup>

<sup>(1)</sup> *Biology Centre, Czech Academy of Sciences, Branišovská 31, České Budějovice, CZ-37005,  
Czech Republic*

<sup>(2)</sup> *University of South Bohemia, Faculty of Science, České Budějovice, Czech Republic*

\* Corresponding author

e-mail: [macas@umbr.cas.cz](mailto:macas@umbr.cas.cz)

phone: +420 387775516

## 1 **Abstract**

2 **Background:** Amplification of monomer sequences into long contiguous arrays is the main  
3 feature distinguishing satellite DNA from other tandem repeats, yet it is also the main obstacle in  
4 its investigation because these arrays are in principle difficult to assemble. Here we explore an  
5 alternative, assembly-free approach that utilizes ultra-long Oxford Nanopore reads to infer the  
6 length distribution of satellite repeat arrays, their association with other repeats and the  
7 prevailing sequence periodicities.

8 **Results:** We have developed a computational workflow for similarity-based detection and  
9 downstream analysis of satellite repeats in individual nanopore reads that led to genome-wide  
10 characterization of their properties. Using the satellite DNA-rich legume plant *Lathyrus sativus*  
11 as a model, we demonstrated this approach by analyzing eleven major satellite repeats using a  
12 set of nanopore reads ranging from 30 to over 200 kb in length and representing 0.73x genome  
13 coverage. We found surprising differences between the analyzed repeats because only two of  
14 them were predominantly organized in long arrays typical for satellite DNA. The remaining nine  
15 satellites were found to be derived from short tandem arrays located within LTR-  
16 retrotransposons that occasionally expanded in length. While the corresponding LTR-  
17 retrotransposons were dispersed across the genome, this array expansion occurred mainly in the  
18 primary constrictions of the *L. sativus* chromosomes, which suggests that these genome regions  
19 are favorable for satellite DNA accumulation.

20 **Conclusions:** The presented approach proved to be efficient in revealing differences in long-  
21 range organization of satellite repeats that can be used to investigate their origin and evolution in  
22 the genome.

23 **Keywords:** satellite DNA; tandem repeats; long-range organization; sequence evolution;  
24 nanopore sequencing; centromeres; heterochromatin; fluorescence *in situ* hybridization;  
25 *Lathyrus sativus*

## 26 **Background**

27 Satellite DNA (satDNA) is a class of highly repeated genomic sequences characterized by its  
28 occurrence in long arrays of almost identical, tandemly arranged units called monomers. It is  
29 ubiquitous in animal and plant genomes, where it can make up to 36% or 18 Gbp/1C of nuclear  
30 DNA (Ambrožová *et al.*, 2010). The monomer sequences are typically hundreds of nucleotides  
31 long, although they can be as short as simple sequence repeats (< 10 bp) (Heckmann *et al.*,  
32 2013) or reach over 5 kb (Gong *et al.*, 2012). Thus, satDNA is best distinguished from other  
33 tandem repeats like micro- or minisatellites by forming much longer arrays (tens of kilobases up  
34 to megabases) that often constitute blocks of chromatin with specific structural and epigenetic  
35 properties (Garrido-Ramos, 2017). This genomic organization and skewed base composition  
36 have played a crucial role in satDNA discovery in the form of additional (satellite) bands  
37 observed in density gradient centrifugation analyses of genomic DNA (Kit, 1961). Thanks to a  
38 number of studies in diverse groups of organisms, the initial view of satellite DNA as genomic  
39 ‘junk’ has gradually shifted to an appreciation of its roles in chromosome organization,  
40 replication and segregation, gene expression, disease phenotypes and reproductive isolation  
41 between species (reviewed in Plohl *et al.*, 2014; Garrido-Ramos, 2015, 2017; Hartley *et al.*,  
42 2019). Despite this progress, there are still serious limitations in our understanding of the  
43 biology of satDNA, especially with respect to the molecular mechanisms underlying its  
44 evolution and turnover in the genome.

45 Although the presence of satDNA is a general feature of eukaryotic genomes, its sequence  
46 composition is highly variable. Most satellite repeat families are specific to a single genus or  
47 even a species (Macas *et al.*, 2002), which makes satDNA the most dynamic component of the  
48 genome. A theoretical framework for understanding satDNA evolution was laid using computer  
49 simulations (reviewed in Elder and Turner 1995). For example, the computer models  
50 demonstrated the emergence of tandem repeats from random non-repetitive sequences by a joint  
51 action of unequal recombination and mutation (Smith, 1976), predicted satDNA accumulation in  
52 genome regions with suppressed meiotic recombination (Stephan, 1986) and evaluated possible  
53 impacts of natural selection (Stephan & Cho, 1994). It was also revealed that recombination-  
54 based processes alone cannot account for the persistence of satDNA in the genome, which  
55 implied that additional amplification mechanisms need to be involved (Walsh, 1987). These  
56 models are of great value because, in addition to predicting conditions that can lead to satDNA  
57 origin, they provide testable predictions regarding tandem repeat homogenization patterns, the  
58 emergence of higher-order repeats (HORs) and the gradual elimination of satDNA from the

59 genome. However, their utilization and further development have been hampered by the lack of  
60 genome sequencing data revealing the long-range organization and sequence variation within  
61 satDNA arrays that were needed to test their predictions.

62 A parallel line of research has focused on elucidating satDNA evolution using molecular and  
63 cytogenetic methods. These studies confirmed that satellite repeats can be generated by tandem  
64 amplification of various genomic sequences, for example, parts of dispersed repeats within  
65 potato centromeres (Gong *et al.*, 2012) or a single-copy intronic sequence in primates (Valeri *et al.*,  
66 2018). An additional putative mechanism of satellite repeat origin was revealed in DNA  
67 replication studies, which showed that repair of static replication forks leads to the generation of  
68 tandem repeat arrays (Kuzminov, 2016). SatDNA can also originate by expansion of existing  
69 short tandem repeat arrays present within rDNA spacers (Macas *et al.*, 2003) and in  
70 hypervariable regions of LTR-retrotransposons (Macas *et al.*, 2009). Moreover, there may be  
71 additional links between the structure or transpositional activity of mobile elements and satDNA  
72 evolution (Meštrović *et al.*, 2015). Once amplified, satellite repeats usually undergo a fast  
73 sequence homogenization within each family, resulting in high similarities of monomers within  
74 and between different arrays. This process is termed concerted evolution (Elder & Turner,  
75 1995) and is supposed to employ various molecular mechanisms, such as gene conversion,  
76 segmental duplication and rolling-circle amplification of extrachromosomal circular DNA.  
77 However, little evidence has been gathered thus far to evaluate real importance of these  
78 mechanisms for satDNA evolution. Since each of these mechanisms leave specific molecular  
79 footprints, this question can be tackled by searching for these patterns within satellite sequences.  
80 However, obtaining such sequence data from a wide range of species has long been a limiting  
81 factor in satDNA investigation.

82 The introduction of next generation sequencing (NGS) technologies (Metzker, 2009) marked a  
83 new era in genome research, including the characterization of repetitive DNA (Weiss-  
84 Schneeweiss *et al.*, 2015). Although the adoption of NGS resulted in a boom of genome  
85 assemblies, the genomes assembled using short-read technologies like Illumina are of limited  
86 use for satDNA investigation because they mostly lack satellite arrays (Peona *et al.*, 2018). On  
87 the other hand, the short-read data are successfully utilized by bioinformatic pipelines  
88 specifically tailored to the identification of satellite repeats employing assembly-free algorithms  
89 (Novák *et al.*, 2010, 2017; Ruiz-Ruano *et al.*, 2016). Although these approaches proved to be  
90 efficient in satDNA identification and revealed a surprising diversity of satellite repeat families  
91 in some plant and animal species (Macas *et al.*, 2015; Ruiz-Ruano *et al.*, 2016; Ávila Robledillo



92 *et al.*, 2018), they, in principle, could not provide much insight into their large-scale arrangement  
93 in the genome. In this respect, the real breakthrough was recently made by the so-called long-  
94 read sequencing technologies that include the Pacific Biosciences and Oxford Nanopore  
95 platforms. Especially the latter has, due to its principle of reading the sequence directly from a  
96 native DNA strand during its passage through a molecular pore, a great potential to generate  
97 “ultra-long” reads reaching up to one megabase (van Dijk *et al.*, 2018). Different strategies  
98 utilizing such long reads for satDNA investigation can be envisioned. First, they can be  
99 combined with other genome sequencing and mapping data to generate hybrid assemblies in  
100 which satellite arrays are faithfully represented and then analyzed. This approach has already  
101 been successfully used for assembling satellite-rich centromere of the human chromosome Y  
102 (Jain *et al.*, 2018) and for analyzing homogenization patterns of satellites in *Drosophila*  
103 *melanogaster* (Weissensteiner *et al.*, 2017). Alternatively, it should be possible to infer various  
104 features of satellite repeats by analyzing repeat arrays or their parts present in individual  
105 nanopore reads. Since only a few attempts have been made to adopt this strategy (Cechova &  
106 Harris, 2018) it has yet to be fully explored, which is the subject of the present study.

107 In this work, we aimed to characterize the basic properties of satellite repeat arrays in a genome-  
108 wide manner by employing bioinformatic analyses of long nanopore reads. As the model for this  
109 study, we selected the grass pea (*Lathyrus sativus* L.), a legume plant with a relatively large  
110 genome (6.52 Gbp/C) and a small number of chromosomes ( $2n = 14$ ) which are amenable to  
111 cytogenetic experiments. The chromosomes have extended primary constrictions with multiple  
112 domains of centromeric chromatin (meta-polycentric chromosomes) (Neumann *et al.*, 2015,  
113 2016) and well-distinguishable heterochromatin bands indicative of the presence of satellite  
114 DNA. Indeed, repetitive DNA characterization from low-pass genome sequencing data revealed  
115 that the *L. sativus* genome is exceptionally rich in tandem repeats that include 23 putative  
116 satDNA families, which combined represent 10.7% of the genome (Macas *et al.*, 2015).  
117 Focusing on the fraction of the most abundant repeats, we developed a workflow for their  
118 detection in nanopore reads and subsequent evaluation of the size distributions of their arrays,  
119 their sequence homogenization patterns and their interspersions with other repetitive sequences.  
120 This work revealed surprising differences of the array properties between the analyzed repeats,  
121 which allowed their classification into two groups that differed in origin and amplification  
122 patterns in the genome.

## 123 **Data Description**

124 For the present study, we chose a set of sixteen putative satellites with estimated genome  
125 proportions exceeding a threshold of 0.1% and reaching up to 2.6% of the *L. sativus* genome  
126 (Table 1). These sequences were selected as the most abundant from a broader set of 23 tandem  
127 repeats that were previously identified in *L. sativus* using graph-based clustering of Illumina  
128 reads (Macas *et al.*, 2015). The clusters selected from this study were further analyzed using a  
129 TAREAN pipeline (Novák *et al.*, 2017), which confirmed their annotation as satellite repeats  
130 and reconstructed consensus sequences of their monomers (Supplementary file 1). The  
131 monomers were 32 bp to 660 bp long and varied in their AT/GC content (46.3-76.6% AT).  
132 Mutual sequence similarities were detected between some of the monomers, which suggested  
133 that they represented variants (sub-families) of the same repeat family (Supplementary Fig. S1).  
134 These included three variants of the satellite families FabTR-51 and FabTR-53 and two variants  
135 of FabTR-52 (Table 1). Except for the FabTR-52 sequences, which were found to be up to 96%  
136 identical to the repeat pLsat described by (Ceccarelli *et al.*, 2010), none of the satellites showed  
137 similarities to sequences in public sequence databases. We assembled a reference database of  
138 consensus sequences and additional sequence variants of all selected satellite repeats to be used  
139 for similarity-based detection of these sequences in the nanopore reads. The reference sequences  
140 were put into the same orientation to allow for evaluation of the orientation of the arrays in the  
141 nanopore reads.

142 We conducted two sequencing runs on the Oxford Nanopore MinION device utilizing  
143 independent libraries prepared from partially fragmented genomic DNA using a 1D ligation  
144 sequencing kit (SQK-LSK109). The two runs resulted in similar size distributions of the reads  
145 (Supplementary Fig. S2, panel A) and combined produced a total of 8.96 Gbp of raw read data.  
146 Following quality filtering, the reads shorter than 30 kb were discarded because we aimed to  
147 analyze only a fraction of the longest reads. The remaining 78,563 reads ranging from 30 kb to  
148 348 kb in length (N50 = 67 kb) provided a total of 4.78 Gbp of sequence data, which  
149 corresponded to 0.73x coverage of the *L. sativus* genome.

## 150 **Analyses**

### 151 ***Detection of the satellite arrays in nanopore reads revealed repeats with*** 152 ***contrasting array length distributions***

153 The strategy for analyzing the length distribution of the satellite repeat arrays in the genome  
154 using nanopore reads is schematically depicted in Fig. 1. The satellite arrays in the nanopore

155 reads were identified by similarity searches against the reference database employing the  
156 LASTZ program (Harris, 2007). Using a set of nanopore reads with known repeat compositions,  
157 we first optimized the LASTZ parameters towards high sensitivity and specificity. Under these  
158 conditions, the satDNA arrays within nanopore reads typically produced a series of short  
159 overlapping similarity hits that were filtered and parsed with custom scripts to detect the  
160 contiguous repeat regions longer than 300 bp. Then, the positions and orientations of the  
161 detected repeats were recorded, while distinguishing whether they were complete or truncated  
162 by the read end. In the latter case, the recorded array length was actually an underestimation of  
163 the real size.

164 When the above analyses were applied to the whole set of nanopore reads, the detected array  
165 lengths were pooled for each satellite repeat, and their distributions were visualized as weighted  
166 histograms with a bin size of 5 kb, distinguishing complete and truncated satellite arrays (Fig.  
167 2). This type of visualization accounts for the total lengths of the satellite sequences that occur in  
168 the genome as arrays of the lengths specified by the bins. Alternatively, the array size  
169 distributions were also plotted as histograms of their counts (Supplementary Fig. S3). As a  
170 control for the satellite repeats, we also analyzed the length distribution of 45S rDNA sequences,  
171 which typically form long arrays of tandemly repeated units (Copenhaver & Pikaard, 1996).  
172 Indeed, the plots revealed that most of the 45S rDNA repeats were detected as long arrays  
173 ranging up to >120 kb (Fig. 2). A similar pattern was expected for the satellite repeats; however,  
174 it was found for only two of them, FabTR-2 and FabTR-53. Both of these repeats were almost  
175 exclusively present as long arrays that extended beyond the lengths of most of the reads. To  
176 verify these results, we analyzed randomly selected reads using sequence self-similarity dot-  
177 plots, which confirmed that most of the arrays spanned entire reads or were truncated at only one  
178 of their ends (Supplementary Fig. S4 A,E). However, all nine remaining satellites generated very  
179 different array length distribution profiles that consisted of relatively large numbers of short (< 5  
180 kb) arrays and comparatively fewer longer arrays (Fig. 2 and Supplementary Fig. S3). The  
181 proportions of these two size classes differed between the satellites, for example, while for  
182 FabTR-58, most of the arrays (98%) were short and only a few were expanded over 5 kb,  
183 FabTR-51 displayed a gradient of sizes from < 5 kb to 174 kb. To check whether these profiles  
184 could have partially been due to differences in the lengths of the reads containing these satellites,  
185 we also analyzed their size distributions. However, the read length distributions were similar  
186 between the different repeats, and there was no bias towards shorter read lengths  
187 (Supplementary Fig. S2, panel B). Thus, we concluded that nine of eleven analyzed satellites

188 occurred in the *L. sativus* genome predominantly as short tandem arrays, and only a fraction of  
189 them expanded to form long arrays typical of satellite DNA. This conclusion was also confirmed  
190 by the dot-plot analyses of the individual reads, which revealed reads carrying short or  
191 intermediate-sized arrays and a few expanded ones (Supplementary Fig. S4 I-N).

192 ***Analysis of genomic sequences adjacent to the satellite arrays identified a***  
193 ***group of satellites that originated from LTR-retrotransposons***

194 Next, we were interested in whether the investigated satellites were frequently associated in the  
195 genome with each other or with other types of repetitive DNA. Using a reference database for  
196 the different lineages of LTR-retrotransposons, DNA transposons, rDNA and telomeric repeats  
197 compiled from *L. sativus* repeated sequences identified in our previous study (Macas *et al.*,  
198 2015), we detected these repeats in the nanopore reads using LASTZ along with the analyzed  
199 satellites. Their occurrences were then analyzed within 10-kb regions directly adjacent to each  
200 satellite repeat array, and the frequencies at which they were associated with individual satDNA  
201 families were plotted with respect to the oriented repeat arrays (Fig. 3). When performed for the  
202 control 45S rDNA, this analysis revealed that they were mostly surrounded by arrays of the  
203 same sequences oriented in the same direction. This pattern emerged due to short interruptions  
204 of otherwise longer arrays. Similar results were found for FabTR-2 and FabTR-53 which also  
205 formed long arrays in the genome. Notably, the adjacent regions could be analyzed for only 33%  
206 and 35% of the FabTR-2 and FabTR-53 arrays, respectively, because these repeats mostly  
207 spanned entire reads. Substantially different profiles were obtained for the remaining nine  
208 satellites, revealing their frequent association with Ogre LTR-retrotransposons. No other repeats  
209 were detected at similar frequencies, except for unclassified LTR retrotransposons that probably  
210 represented less-conserved Ogre sequences. At a much smaller frequency ( $\sim 0.1$ ), the FabTR-54  
211 repeat was found to be adjacent to the FabTR-56 satellite arrays. Based on its position and size  
212 in relation to FabTR-56, the detected pattern corresponded to short FabTR-54 arrays attached to  
213 FabTR-56 in a direction-specific manner. Inspection of the individual reads confirmed that short  
214 arrays of these satellites occurred together in a part of the reads (Supplementary Fig. S4L). A  
215 peculiar pattern was revealed for FabTR-58 that consisted of a series of peaks that suggested  
216 interlacing FabTR-58 and Ogre sequences at fixed intervals (Fig. 3). This pattern was found to  
217 be due to occurrence of complex arrays consisting of multiple short arrays of FabTR-58  
218 arranged in the same orientation and embedded into Ogre sequences (Supplementary Fig. S4Q).  
219 Upon closer inspection, this organization was found in numerous reads.

220 OGRE elements represent a distinct phylogenetic lineage of Ty3/gypsy LTR-retrotransposons  
221 (Neumann *et al.*, 2019) that were amplified to high copy numbers in some plant species  
222 including *L. sativus*. Because they comprise 45% of the *L. sativus* genome (Macas *et al.*, 2015),  
223 the frequent association of OGRES with short array satellites could simply be due to their random  
224 interspersions. However, we noticed from the structural analysis of the reads that these short  
225 arrays were often surrounded by two direct repeats, which is a feature typical of LTR-  
226 retrotransposons. This finding could mean that the arrays are actually embedded within the OGRE  
227 elements and were not only frequently adjacent to them by chance. To test this hypothesis, we  
228 performed an additional analysis of the array neighborhoods, but this time, we specifically  
229 detected parts of the OGRE sequences coding for the retroelement protein domains GAG, protease  
230 (PROT), reverse transcriptase (RT), RNase H (RH), archeal RNase H (aRH) and integrase  
231 (INT). If the association of OGRE sequences with the satellite arrays was random, these domains  
232 would be detected at various distances and orientations with respect to the arrays. In contrast,  
233 finding them in a fixed arrangement would confirm that the tandem arrays were in fact parts of  
234 the OGRE elements and occurred there in specific positions. As evident from Fig. 4A, that latter  
235 explanation was confirmed for all nine satellites. We found that their arrays occurred  
236 downstream of the OGRE *gag-pol* region including the LTR-retrotransposon protein coding  
237 domains in the expected order and orientation (see the element structure in Fig. 4B). In two  
238 cases (FabTR-54 and 57), some protein domains were not detected, and major peaks  
239 corresponded to the GAG domain which was relatively close to the tandem arrays. These  
240 patterns were explained by the frequent occurrence of these tandem arrays in non-autonomous  
241 elements lacking their *pol* regions due to large deletions. In approximately half of the satellites  
242 (e.g., FabTR-51 and 52), we detected additional smaller peaks corresponding to the domains in  
243 both orientations located approximately 7-10 kb from the arrays. Further investigation revealed  
244 that these peaks represented OGRE elements that were inserted into the expanded arrays of  
245 corresponding satellites (Supplementary Fig. S4K). Consequently, they were detected only in  
246 satellites such as FabTR-51 and 52 in which the proportions of expanded arrays were relatively  
247 large and not FabTR-58 in which the expanded arrays were almost absent.

### 248 **Satellites with mostly expanded arrays show higher variation in their** 249 **sequence periodicities**

250 The identification of large numbers of satellite arrays in the nanopore reads provided sequence  
251 data for investigating the conservation of monomer lengths and the eventual occurrence of  
252 additional monomer length variants and HORs. To this purpose we designed a computational

253 pipeline that extracted all satellite arrays longer than 30 kb and subjected them to a periodicity  
254 analysis using the fast Fourier transform algorithm (Venables & Ripley, 2002). The analysis  
255 revealed the prevailing monomer sizes and eventual additional periodicities in the tandem repeat  
256 arrays as periodicity spectra containing peaks at positions corresponding to the lengths of the  
257 tandemly repeated units. These periodicity spectra were averaged for all arrays of the same  
258 satellite (Fig. 5) or plotted separately for the individual arrays to explore the periodicity  
259 variations (Supplementary Fig. S5). As an alternative approach, we also visualized the array  
260 periodicities using nucleotide autocorrelation functions (Herzel *et al.*, 1999; Macas *et al.*, 2006).  
261 In selected cases, we verified the periodicity patterns within arrays using dot-plot analyses  
262 (Supplementary Fig. S4 B-D and F-H).

263 As expected, the periodicity spectra of all satellites contained peaks corresponding to their  
264 monomer lengths (Fig. 5 and Table 1). In the nine OGRE-derived satellite repeats, the monomer  
265 periods were the longest detected and corresponded to the fundamental frequencies. There were  
266 only a few additional peaks detected with shorter periods that corresponded to higher harmonics  
267 (see Methods) or possibly reflected short subrepeats or underlying single-base periodicities. In  
268 contrast, FabTR-2 and FabTR-53 repeats, which occur in the genome as the expanded arrays,  
269 displayed more periodicity variations. Various HORs that probably originated from multimers of  
270 the 49 bp consensus were detected in the FabTR-2 arrays. Closer examination of the individual  
271 arrays revealed that the multiple peaks evident in the averaged periodicity spectrum (Fig. 5)  
272 originated as combinations of several simpler HOR patterns that differed between individual  
273 satellite arrays (Supplementary Fig. S5). In FabTR-53, the HORs were not detected, but a  
274 number shorter periodicities were revealed, which suggests that the current monomers of 660,  
275 368 and 565 bp (subfamilies A, B and C, respectively) actually originated as higher-order  
276 repeats of shorter units of ~190 bp (Fig. 5). An additional analysis using autocorrelation  
277 functions generally agreed with the fast Fourier transform approach and confirmed the high  
278 variabilities in FabTR-2 and FabTR-53 (Supplementary Fig. S5).

### 279 ***Array expansion of the retrotransposon-derived satellites occurred*** 280 ***preferentially in the pericentromeric regions of L. sativus chromosomes***

281 To complement the analysis of satellite arrays with the information about their genomic  
282 distribution, we performed their detection on metaphase chromosomes using fluorescence *in situ*  
283 hybridization (FISH) (Fig. 6). Labeled oligonucleotides corresponding to the most conserved  
284 parts of the monomer sequences were used as hybridization probes in all cases except for  
285 FabTR-53 for which a mix of two cloned probes was used instead due to its relatively long



286 monomers (Table 1 and Supplementary file 2). Although each satellite probe generated a  
287 different labeling pattern, most of them were located within the primary constrictions. The  
288 exception was FabTR-53, which produced strong hybridization signals that overlapped with  
289 most of the subtelomeric heterochromatin bands (Fig. 6A). The other distinct pattern was  
290 revealed for FabTR-2, which produced a series of dots along the periphery of the primary  
291 constrictions on all chromosomes (Fig. 6B). This pattern was identical to that obtained using an  
292 antibody to centromeric histone variant CenH3 (Neumann *et al.*, 2015, 2016), which suggests  
293 that FabTR-2 is the centromeric satellite. The remaining nine probes corresponding to OGRE-  
294 derived satellites mostly produced bands at various parts of primary constrictions (Fig. 6C-F and  
295 Supplementary Fig. S6). For example, the bands of FabTR-54 occurred within or close to the  
296 primary constrictions of all chromosomes and produced a labeling pattern which, together with  
297 the chromosome morphology, allowed us distinguish all chromosome types within the *L. sativus*  
298 karyotype (Fig. 6C). A peculiar pattern was generated by the FabTR-51 subfamily A probe,  
299 which painted whole primary constrictions of one pair of chromosomes (chromosome 1, Fig.  
300 6D); a similar pattern was produced by the FabTR-52 probe, but it labeled the entire primary  
301 constrictions of a different pair (chromosome 7, Fig. 6E).

302 Although the FISH signals of the OGRE-derived satellites were supposed to originate from their  
303 expanded and sequence-homogenized arrays, we had to consider the possibility that the probes  
304 had also cross-hybridized to the short repeat arrays within the elements; therefore these FISH  
305 patterns may have reflected the genome distribution of OGRE elements. Thus, we investigated the  
306 OGRE distribution in the *L. sativus* genome using a probe designed from the major sequence  
307 variant of the integrase coding domain of the elements carrying the satellite repeats (see the  
308 element scheme in Fig. 4B). The probe produced signals dispersed along the whole  
309 chromosomes that differed from the locations of the bands in the primary constrictions revealed  
310 by the satellite repeat probes (Fig. 6G-I). Thus, these results confirmed that, while the OGRE  
311 elements carrying short tandem repeat arrays were dispersed throughout the genome, these  
312 arrays expanded and gave rise to long satellite arrays only within the primary constrictions.

## 313 Discussion

314 In this work, we demonstrated that the detection and analysis of satellite repeat arrays in the bulk  
315 of individual nanopore reads is an efficient method to characterize satellite DNA properties in a  
316 genome-wide manner. This is a new addition to an emerging toolbox of approaches utilizing  
317 long sequence reads for investigating satellite DNA in complex eukaryotic genomes. Currently,

318 these approaches have primarily been based on generating improved assemblies of satellite-rich  
319 regions and their subsequent analyses (Weissensteiner *et al.*, 2017; Jain *et al.*, 2018).  
320 Alternatively, satellite array length variation was analyzed using the long reads aligned to the  
321 reference genome (Mitsuhashi *et al.*, 2019) or by detecting a single specific satellite locus in the  
322 reads (Roeck *et al.*, 2018). Compared to these approaches, our strategy does not distinguish  
323 individual satDNA arrays in the genome. Instead, our approach applies statistics to partial  
324 information gathered from individual reads to infer the general properties of the investigated  
325 repeats. As such, this approach can analyze any number of different satellite repeats  
326 simultaneously and without the need for a reference genome. However, the inability to  
327 specifically address individual repeat loci in the genome may be considered a limitation of our  
328 approach. For example, we could not precisely measure the sizes of the arrays that were longer  
329 than the analyzed reads and instead provided lower bounds of their lengths. On the other hand,  
330 we could reliably distinguish tandem repeats that occurred in the genome predominantly in the  
331 form of short arrays from those forming only long contiguous arrays and various intermediate  
332 states between these extremes. Additionally, we could analyze the internal arrangements of the  
333 identified arrays and characterized the sequences that frequently surrounded the arrays in the  
334 genome. This analysis was achieved with a sequencing coverage that was substantially lower  
335 compared with that needed for genome assembly. Thus, this approach could be of particular use  
336 when analyzing very large genomes, genomes of multiple species in parallel or simply whenever  
337 sequencing resources are limited.

338 We found that only two of the eleven-most abundant satellite repeats occurred in the genome  
339 exclusively as long tandem arrays typical of satellite DNA. Both occupied specific genome  
340 regions, FabTR-2 was associated with centromeric chromatin, and FabTR-53 made up  
341 subtelomeric heterochromatic bands on mitotic chromosomes. Both are also present in other  
342 *Fabeae* species (Macas *et al.*, 2015), which suggests that they are phylogenetically older  
343 compared with the rest of the investigated *L. sativus* satellites. The other feature common to  
344 these satellites was the occurrence of HORs that emerge when a satellite array becomes  
345 homogenized by units longer than single monomers. The factors that trigger this shift are not  
346 clear, however, it is likely that chromatin structure plays a role in this process by exposing only  
347 specific, regularly-spaced parts of the array to the recombination-based homogenization. There  
348 are examples of HORs associated with specific types of chromatin (Henikoff *et al.*, 2015) or  
349 chromosomal locations (Macas *et al.*, 2006), but data from a wider range of species and diverse  
350 satellite repeats are needed to provide a better insight into this phenomenon. The methodology



351 presented here may be instrumental in this task because both the fast Fourier transform and the  
352 nucleotide autocorrelation function algorithms employed for the periodicity analyses proved to  
353 be accurate and capable of processing large volume of sequence data provided by nanopore  
354 sequencing.

355 One of the key findings of this study is that the majority of *L. sativus* satellites originated from  
356 short tandem repeats present in the 3' untranslated regions (3'UTRs) of Ogre retrotransposons.  
357 These hypervariable regions made of tandem repeats that vary in sequences and lengths of their  
358 monomers are common in elements of the Tat lineage of plant LTR-retrotransposons, including  
359 Ogres (Macas *et al.*, 2009; Neumann *et al.*, 2019). These tandem repeats were hypothesized to  
360 be generated during element replication by illegitimate recombination or abnormal strand  
361 transfers between two element copies that are co-packaged in a single virus-like particle (Macas  
362 *et al.*, 2009); however, the exact mechanism is yet to be determined. The same authors also  
363 documented several cases of satellite repeats that likely originated by the amplification of  
364 3'UTR tandem repeats. In addition to proving this mechanism by detecting various stages of the  
365 retroelement array expansions in the nanopore reads, the present work on *L. sativus* is the first in  
366 which this phenomenon was found to be responsible for the emergence of so many different  
367 satellites within a single species. Considering the widespread occurrence and high copy numbers  
368 of Tat/Ogre elements in many plant taxa (Neumann *et al.*, 2006; Macas & Neumann, 2007;  
369 Kubát *et al.*, 2014; Macas *et al.*, 2015), it can be expected that they play a significant role in  
370 satDNA evolution by providing a template for novel satellites that emerge by the expansion of  
371 their short tandem repeats. Additionally, similar tandem repeats occur in other types of mobile  
372 elements; thus, this phenomenon is possibly even more common. For example, tandem repeats  
373 within the DNA transposon *Tetris* have been reported to give rise to a novel satellite repeat in  
374 *Drosophila virilis* (Dias *et al.*, 2014).

375 The other important observation presented here is that the long arrays of all nine Ogre-derived  
376 satellites are predominantly located in the primary constrictions of metaphase chromosomes.  
377 This implies that these regions are favorable for array expansion, perhaps due to specific  
378 features of the associated chromatin. Indeed, it has been shown that extended primary  
379 constrictions of *L. sativus* carry a distinct type of chromatin that differs from the chromosome  
380 arms by the histone phosphorylation and methylation patterns (Neumann *et al.*, 2016). However,  
381 it is not clear how these chromatin features could promote the amplification of satellite DNA. An  
382 alternative explanation could be that the expansion of the Ogre-derived tandem arrays occurs  
383 randomly at different genomic loci, but the expanded arrays persist better in the constrictions

384 compared with the chromosome arms. Because excision and eventual elimination of tandem  
385 repeats from chromosomes is facilitated by their homologous recombination (Navrátilová *et al.*,  
386 2008), this explanation would be supported by the absence of meiotic recombination in the  
387 centromeric regions. The regions with suppressed recombination have also been predicted as  
388 favorable for satDNA accumulation by computer models (Stephan, 1986). These hypotheses can  
389 be tested in the future investigations of properly selected species. For example, the species  
390 known to carry chromosome regions with suppressed meiotic recombination located apart from  
391 the centromeres would be of particular interest. Such regions occur, for instance, on sex  
392 chromosomes (Vyskot & Hobza, 2015), which should allow for assessments of the effects of  
393 suppressed recombination without the eventual interference of the centromeric chromatin. In this  
394 respect, the spreading of short tandem arrays throughout the genome by mobile elements  
395 represents a sort of natural experiment, providing template sequences for satDNA amplification,  
396 which in turn, could be used to identify genome and chromatin properties favoring satDNA  
397 emergence and persistence in the genome.

## 398 **Methods**

### 399 ***DNA isolation and nanopore sequencing***

400 Seeds of *Lathyrus sativus* were purchased from Fratelli Ingegnoli S.p.A. (Milano, Italy, cat.no.  
401 455). High molecular weight (HMW) DNA was extracted from leaf nuclei isolated using a  
402 protocol adapted from (Vershinin & Heslop-Harrison, 1998) and (Macas *et al.*, 2007). Five  
403 grams of young leaves were frozen in liquid nitrogen, ground to a fine powder and incubated for  
404 5 min in 35 ml of ice-cold H buffer (1x HB, 0.5 M sucrose, 1 mM phenylmethyl-  
405 sulphonylfluoride (PMSF), 0.5% (v/v) Triton X-100, 0.1% (v/v) 2-mercaptoethanol). The H  
406 buffer was prepared fresh from 10x HB stock (0.1 M TRIS-HCl pH 9.4, 0.8 M KCl, 0.1 M  
407 EDTA, 40 mM spermidine, 10 mM spermine). The homogenate was filtered through 48 µm  
408 nylon mesh, adjusted to 35 ml volume with 1x H buffer, and centrifuged at 200 × g for 15 min at  
409 4°C. The pelleted nuclei were resuspended and centrifuged using the same conditions after  
410 placement in 35 ml of H buffer and 15 ml of TC buffer (50 mM TRIS-HCl pH 7.5, 75 mM  
411 NaCl, 6 mM MgCl<sub>2</sub>, 0.1 mM CaCl<sub>2</sub>). The final centrifugation was performed for 5 min only, and  
412 the nuclei were resuspended in 2 ml of TC. HMW DNA was extracted from the pelleted nuclei  
413 using a modified CTAB protocol (Murray & Thompson, 1980). The suspension of the nuclei  
414 was mixed with an equal volume of 2x CTAB buffer (1.4 M NaCl, 100 mM Tris-HCl pH 8.0,  
415 2% CTAB, 20 mM EDTA, 0.5% (w/v) Na<sub>2</sub>S<sub>2</sub>O<sub>5</sub>, 2% (v/v) 2-mercaptoethanol) and incubated at

416 50°C for 30-40 min. The solution was extracted with chloroform : isoamylalcohol (24:1) using  
417 MaXtract™ High Density Tubes (Qiagen) and precipitated with a 0.7 volume of isopropanol  
418 using a sterile glass rod to collect the DNA. Following two washes in 70% ethanol, the DNA  
419 was dissolved in TE and treated with 2 µl of RNase Cocktail™ Enzyme Mix (Thermo Fisher  
420 Scientific) for 1 h at 37°C. The DNA integrity was checked by running a 200 ng aliquot on  
421 inverted field gel electrophoresis (FIGE Mapper, BioRad). Because intact HMW DNA gave poor  
422 yields when used with the Oxford Nanopore Ligation Sequencing Kit, the DNA was mildly  
423 fragmented by slowly passing the sample through a 0.3 x 12 mm syringe to get a fragment size  
424 distribution ranging from ~30 kb to over 100 kb. Finally, the DNA was further purified by  
425 mixing the sample with a 0.5 volume of CU and a 0.5 volume of IR solution from the Qiagen  
426 DNeasy PowerClean Pro Clean Up Kit (Qiagen), centrifugation for 2 min at 15,000 rpm at room  
427 temperature and DNA precipitation from the supernatant using a 2.5 volume of 96% ethanol.  
428 The DNA was dissolved in 10 mM TRIS-HCl pH 8.5 and stored at 4°C.

429 The sequencing libraries were prepared from 3 µg of the partially fragmented and purified DNA  
430 using a Ligation Sequencing Kit SQK-LSK109 (Oxford Nanopore Technologies) following the  
431 manufacturer's protocol. Briefly, the DNA was treated with 2 µl of NEBNext FFPE DNA Repair  
432 Mix and 2 µl of NEBNext Ultra II End-prep enzyme mix in a 60 µl volume that also included  
433 3.5 µl of FFPE and 3.5 µl of End-prep reaction buffers (New England Biolabs). The reaction was  
434 performed at 20°C for 5 min and 65°C for 5 min. Then, the DNA was purified using a 0.4x  
435 volume of AMPure XP beads (Beckman Coulter); because long DNA fragments caused  
436 clumping of the beads and were difficult to detach, the elution was performed with 3 mM TRIS-  
437 HCl (pH 8.5) and was extended up to 40 min. Subsequent steps including adapter ligation using  
438 NEBNext Quick T4 DNA Ligase and the library preparation for the sequencing were performed  
439 as recommended. The whole library was loaded onto FLO-MIN106 R9.4 flow cell and  
440 sequenced until the number of active pores dropped below 40 (21-24 h). Two sequencing runs  
441 were performed, and the acquired sequence data was first analyzed separately to examine  
442 eventual variations. However, because the runs generated similar read length profiles and  
443 analysis results, the data were combined for the final analysis.

#### 444 ***Bioinformatic analysis of the nanopore reads***

445 The raw nanopore reads were basecalled using Oxford Nanopore basecaller Guppy (ver. 2.3.1).  
446 Quality-filtering of the resulting FastQ reads and their conversion to the FASTA format were  
447 performed with BBDuk (part of the BBTools, <https://jgi.doe.gov/data-and-tools/bbtools/>) run

448 with the parameter  $\text{maq}=8$ . Reads shorter than 30 kb were discarded. Unless stated otherwise, all  
449 bioinformatic analyses were implemented using custom Python and R scripts and executed on a  
450 Linux-based server equipped with 64 GB RAM and 32 CPUs.

451 Satellite repeat sequences were detected in the nanopore reads by similarity searches against a  
452 reference database compiled from contigs assembled from clusters of *L. sativus* Illumina reads  
453 in the frame of our previous study (Macas *et al.*, 2015). Additionally, the database included  
454 consensus sequences and their most abundant sequence variants calculated from the same  
455 Illumina reads using the TAREAN pipeline (Novák *et al.*, 2017) executed with the default  
456 parameters and cluster merging option enabled. For each satellite, the reference sequences in the  
457 database were placed in the same orientation to allow for the evaluation of the orientations of the  
458 satellite arrays in the nanopore reads. The sequence similarities between the reads and the  
459 reference database were detected using LASTZ (Harris, 2007). The program parameters were  
460 fine-tuned for error-prone nanopore reads using a set of simulated and real reads with known  
461 repeat contents while employing visual evaluation of the reported hits using the Integrative  
462 Genomics Viewer (Thorvaldsdóttir *et al.*, 2013). The LASTZ command including the optimized  
463 parameters was “lastz nanopore\_reads[multiple,unmask] reference\_database -format=general:  
464 name1,size1,start1,length1,strand1,name2,size2,start2,length2,strand2,identity,score -ambiguous  
465 =iupac --xdrop=10 --hspthresh=1000”. Additionally, the hits with bit scores below 7000 and  
466 those with lengths exceeding 1.23x the length of the corresponding reference sequence were  
467 discarded (the latter restriction was used to discard the partially unspecific hits that spanned a  
468 region of unrelated sequence embedded between two regions with similarities to the reference).  
469 Because the similarity searches typically produced large numbers of overlapping hits, they were  
470 further processed using custom scripts to detect the coordinates of contiguous repeat regions in  
471 the reads (Fig. 1). The regions longer than 300 bp (satellite repeats) or 500 bp (rDNA and  
472 telomeric repeats) were recorded and further analyzed. The positions and orientations of the  
473 detected satellites were recorded in the form of coded reads where nucleotide sequences were  
474 replaced by characters representing the codes for the detected repeats and their orientations, or  
475 “0” and “X”, which denoted no detected repeats and annotation conflicts, respectively. In the  
476 case of the analysis of repeats other than satellites, the reference databases were augmented for  
477 assembled contig sequences representing the following most abundant groups of *L. sativus*  
478 dispersed repeats: Ty3/gypsy/Ogre, Ty3/gypsy/Athila, Ty3/gypsy/Chromovirus, Ty3/gypsy/other,  
479 Ty1/copia/Maximus, Ty1/copia/other, LTR/unclassified and DNA transposon. These repeats

481 were not arranged nor scored with respect to their orientations. In cases of annotation conflicts  
482 of these repeats with the selected satellites, they were scored with lower priority.

483 Detection of the retrotransposon protein coding domains in the read sequences was performed  
484 using DANTE, which is a bioinformatic tool available on the RepeatExplorer server  
485 (<https://repeatexplorer-elixir.cerit-sc.cz/>) employing the LAST program (Kielbasa *et al.*,  
486 2011) for similarity searches against the REXdb protein database (Neumann *et al.*, 2019). The  
487 hits were filtered to pass the following cutoff parameters: minimum identity = 0.3, min.  
488 similarity = 0.4, min. alignment length = 0.7, max. interruptions (frameshifts or stop codons) =  
489 10, max. length proportion = 1.2, and protein domain type = ALL. The positions of the filtered  
490 hits were then recorded in coded reads as described above.

491 Analysis of the association of the satellite arrays with other repeats was performed by  
492 summarizing the frequencies of all types of repeats detected within 10 kb regions directly  
493 adjacent to all arrays of the same satellite repeat family. Visual inspection of the repeat  
494 arrangement within the individual nanopore reads using self-similarity dot-plot analysis was  
495 performed using the Dotter (Sonnhammer & Durbin, 1995) and Gepard (Krumisiek *et al.*,  
496 2007) programs.

497 Periodicity analysis was performed for the individual satellite repeat arrays longer than 30 kb  
498 that were extracted from the nanopore reads and plotted for each array separately or averaged for  
499 all arrays of the same satellite. The analysis was performed using the fast Fourier transform  
500 algorithm (Venables & Ripley, 2002) as implemented in R programming environment. Briefly, a  
501 nucleotide sequence  $X$  was converted to its numerical representation  $\hat{X}$  where

$$\hat{X}(i) = \begin{cases} 1 & \text{if } X(i) = A \\ 2 & \text{if } X(i) = C \\ 3 & \text{if } X(i) = G \\ 4 & \text{if } X(i) = T \end{cases}$$

502 For the resulting sequences of integers, fast Fourier transform was conducted, and the  
503 frequencies  $f$  from the frequency spectra were converted to periodicity  $T$  as:

$$T = \frac{L}{f}$$

504 where  $L$  is the length of the analyzed satellite array. The analysis reveals the lengths of  
505 monomers and other tandemly repeated units like HORs as peaks at the corresponding positions

506 on the resulting periodicity spectrum. However, it should be noted that, while these sequence  
507 periodicities will always be represented by peaks, some additional peaks with shorter periods  
508 could have merely reflected higher harmonics that are present due to the non-sine character of  
509 the numerical representation of nucleotide sequences (Li, 1997; Sharma *et al.*, 2004).  
510 Alternatively, periodicity was analyzed using the autocorrelation function as implemented in the  
511 R programming environment (McMurry & Politis, 2010). Nucleotide sequence,  $X$ , was first  
512 converted to four numerical representations:  $\widehat{X}_A, \widehat{X}_C, \widehat{X}_T, \widehat{X}_G$  where:

$$\widehat{X}_N = \begin{cases} 1 & \text{if } X(i) = N \\ 0 & \text{if } X(i) \neq N \end{cases}$$

513 The resulting numerical series were used to calculate the autocorrelations with a lag ranging  
514 from 2 to 2000 nucleotides.

### 515 **Chromosome preparation and fluorescence in situ hybridization (FISH)**

516 Mitotic chromosomes were prepared from root tip meristems synchronized using 1.18 mM  
517 hydroxyurea and 15  $\mu$ M oryzalin as described previously (Neumann *et al.*, 2015). Synchronized  
518 root tip meristems were fixed in a 3:1 v/v solution of methanol and glacial acetic acid for 2 days  
519 at 4°C. Then the meristems were washed in ice-cold water and digested in 4% cellulase  
520 (Onozuka R10, Serva Electrophoresis, Heidelberg, Germany), 2% pectinase and 0.4%  
521 pectolyase Y23 (both MP Biomedicals, Santa Ana, CA) in 0.01 M citrate buffer (pH 4.5) for 90  
522 min at 37°C. Following the digestion, the meristems were carefully washed in ice-cold water  
523 and postfixed in the 3:1 fixative solution for 1 day at 4°C. The chromosome spreads were  
524 prepared by transferring one meristem to a glass slide, macerating it in a drop of freshly made  
525 3:1 fixative and placing the glass slide over a flame as described in (Dong *et al.*, 2000). After  
526 air-drying, the chromosome preparation were kept at -20°C until used for FISH.

527 Oligonucleotide FISH probes were labeled with biotin, digoxigenin or rhodamine-red-X at their  
528 5' ends during synthesis (Integrated DNA Technologies, Leuven, Belgium). They were used for  
529 all satellite repeats except for FabTR-53, for which two genomic clones, c1644 and c1645, were  
530 used instead. The clones were prepared by PCR amplification of *L. sativus* genomic DNA using  
531 primers LASm7c476F (5'-GTT TCT TCG TCA GTA AGC CAC AG-3') and LASm7c476R (5'-  
532 TGG TGA TGG AGA AGA AAC ATAT TG-3'), cloning the amplified band and sequence  
533 verification of randomly picked clones as described (Macas *et al.*, 2015). The same approach  
534 was used to generate probe corresponding to the integrase coding domain of the Ty3/gypsy Ogre  
535 elements. The PCR primers used to amplify the prevailing variant A (clone c1825) were



536 PN\_ID914 (5'-TCT CMY TRG TGT ACG GTA TGG AAG-3') and PN\_ID915 (5'-CCT TCR  
537 TAR TTG GGA GTC CA-3'). The sequences of all probes are provided in Supplementary file 2.  
538 The clones were biotin-labeled using nick translation (Kato *et al.*, 2006). FISH was performed  
539 according to (Macas *et al.*, 2007) with hybridization and washing temperatures adjusted to  
540 account for the AT/GC content and hybridization stringency while allowing for 10-20%  
541 mismatches. The slides were counterstained with 4',6-diamidino-2-phenylindole (DAPI),  
542 mounted in Vectashield mounting medium (Vector Laboratories, Burlingame, CA) and examined  
543 using a Zeiss AxioImager.Z2 microscope with an Axiocam 506 mono camera. The images were  
544 captured and processed using ZEN pro 2012 software (Carl Zeiss GmbH).

## 545 **Availability of source code and requirements**

- 546 • Project Name: nanopore-read-annotation
- 547 • Project homepage: <https://github.com/vondrakt/nanopore-read-annotation>
- 548 • Operating system(s): Linux
- 549 • Programming language: python3, R
- 550 • Other requirements: R packages: TSclust, Rfast, Biostrings (Bioconductor),
- 551 • License: GPLv3

## 552 **Availability of supporting data and materials**

553 Raw nanopore reads are available in the European Nucleotide Archive  
554 (<https://www.ebi.ac.uk/ena>) under run accession numbers ERR3374012 and ERR3374013.

## 555 **Declarations**

### 556 ***List of abbreviations***

557 aRH, archeal ribonuclease H; FISH, fluorescence *in situ* hybridization; HMW, high molecular  
558 weight; HOR, higher order repeat; INT, integrase; LTR, long terminal repeat; PROT, protease;  
559 RH, ribonuclease H; RT, reverse transcriptase; satDNA, satellite DNA.

### 560 ***Consent for publication***

561 Not applicable.

## 562 **Competing interests**

563 The authors declare that they have no competing interests.

## 564 **Funding**

565 This work was supported supported by the ERDF/ESF project ELIXIR-CZ - Capacity building  
566 (No. CZ.02.1.01/0.0/0.0/16\_013/0001777) and the ELIXIR-CZ research infrastructure project  
567 (MEYS No: LM2015047) including access to computing and storage facilities.

## 568 **Authors' contributions**

569 J.M. conceived the study and drafted the manuscript. T.V. and P.No. developed the scripts for the  
570 bioinformatic analysis, and T.V., P.No., P.Ne. and J.M. analyzed the data. A.K. isolated the  
571 HMW genomic DNA and cloned the FISH probes. J.M. performed the nanopore sequencing.  
572 L.A.R. conducted the FISH experiments. All authors reviewed and approved the final  
573 manuscript.

## 574 **Acknowledgements**

575 We thank Ms. Vlasta Tetourová and Ms. Jana Látalová for their excellent technical assistance.

## 576 **References**

- 577  
578 **Ambrožová K, Mandáková T, Bureš P, Neumann P, Leitch IJ, Koblížková A, Macas J,**  
579 **Lysák MA. 2010.** Diverse retrotransposon families and an AT-rich satellite DNA revealed in  
580 giant genomes of *Fritillaria* lilies. *Annals of Botany* **107**: 255–268.
- 581 **Ávila Robledillo L, Koblížková A, Novák P, Böttinger K, Vrbová I, Neumann P, Schubert I,**  
582 **Macas J. 2018.** Satellite DNA in *Vicia faba* is characterized by remarkable diversity in its  
583 sequence composition, association with centromeres, and replication timing. *Scientific Reports*  
584 **8**: 5838.
- 585 **Ceccarelli M, Sarri V, Polizzi E, Andreozzi G, Cionini PG. 2010.** Characterization, evolution  
586 and chromosomal distribution of two satellite DNA sequence families in *Lathyrus* species.  
587 *Cytogenetic and Genome Research* **128**: 236–244.
- 588 **Cechova M, Harris RS. 2018.** High inter- and intraspecific turnover of satellite repeats in great  
589 apes. *bioRxiv*: doi:10.1101/470054.
- 590 **Copenhaver GP, Pikaard CS. 1996.** Two-dimensional RFLP analyses reveal megabase-sized  
591 clusters of rRNA gene variants in *Arabidopsis thaliana*, suggesting local spreading of variants as  
592 the mode for gene homogenization during concerted evolution. *The Plant Journal* **9**: 273–282.



- 593 **Dias GB, Svartman M, Delprat A, Ruiz A, Kuhn GCS. 2014.** Tetris is a foldback transposon  
594 that provided the building blocks for an emerging satellite DNA of *Drosophila virilis*. *Genome*  
595 *Biology and Evolution* **6**: 1302–1313.
- 596 **van Dijk EL, Jaszczyszyn Y, Naquin D, Thermes C. 2018.** The third revolution in sequencing  
597 technology. *Trends in Genetics* **34**: 666–681.
- 598 **Dong F, Song J, Naess SK, Helgeson JP, Gebhardt C, Jiang J. 2000.** Development and  
599 applications of a set of chromosome-specific cytogenetic DNA markers in potato. *Theoretical*  
600 *and Applied Genetics* **101**: 1001–1007.
- 601 **Elder JF, Turner BJ. 1995.** Concerted evolution of repetitive DNA sequences in eukaryotes.  
602 *The Quarterly Review of Biology* **70**: 297–320.
- 603 **Garrido-Ramos MA. 2015.** Satellite DNA in plants: more than just rubbish. *Cytogenetic and*  
604 *Genome Research* **146**: 153–170.
- 605 **Garrido-Ramos MA. 2017.** Satellite DNA: An evolving topic. *Genes* **8**: 230.
- 606 **Gong Z, Wu Y, Koblížková A, Torres G a, Wang K, Iovene M, Neumann P, Zhang W,**  
607 **Novák P, Buell CR, et al. 2012.** Repeatless and repeat-based centromeres in potato:  
608 implications for centromere evolution. *Plant Cell* **24**: 3559–3574.
- 609 **Harris RS. 2007.** *Improved pairwise alignment of genomic DNA*. Ph.D. Thesis, The  
610 Pennsylvania State University.
- 611 **Hartley G, O’Neill R, Hartley G, O’Neill RJ. 2019.** Centromere repeats: hidden gems of the  
612 genome. *Genes* **10**: 223.
- 613 **Heckmann S, Macas J, Kumke K, Fuchs J, Schubert V, Ma L, Novák P, Neumann P,**  
614 **Taudien S, Platzer M, et al. 2013.** The holocentric species *Luzula elegans* shows interplay  
615 between centromere and large-scale genome organization. *Plant Journal* **73**: 555–565.
- 616 **Henikoff JG, Thakur J, Kasinathan S, Henikoff S. 2015.** A unique chromatin complex  
617 occupies young alpha-satellite arrays of human centromeres. *Science Advances* **1**: e1400234.
- 618 **Herzel H, Weiss O, Trifonov EN. 1999.** 10-11 bp periodicities in complete genomes reflect  
619 protein structure and DNA folding. *Bioinformatics* **15**: 187–193.
- 620 **Jain M, Olsen HE, Turner DJ, Stoddart D, Bulazel K V, Paten B, Haussler D, Willard HF,**  
621 **Akeson M, Miga KH. 2018.** Linear assembly of a human centromere on the Y chromosome.  
622 *Nature Biotechnology* **36**: 321–323.
- 623 **Kato A, Albert PS, Vega JM, Birchler JA. 2006.** Sensitive fluorescence *in situ* hybridization  
624 signal detection in maize using directly labeled probes produced by high concentration DNA  
625 polymerase nick translation. *Biotech Histochem* **81**: 71–78.
- 626 **Kielbasa SM, Wan R, Sato K, Kiebas SM, Horton P, Frith MC. 2011.** Adaptive seeds tame  
627 genomic sequence comparison. *Genome Research* **21**: 487–493.

- 628 **Kit S. 1961.** Equilibrium sedimentation in density gradients of DNA preparations from animal  
629 tissues. *Journal of Molecular Biology* **3**: 711–716.
- 630 **Krumsiek J, Arnold R, Rattei T. 2007.** Gepard: a rapid and sensitive tool for creating dotplots  
631 on genome scale. *Bioinformatics* **23**: 1026–1028.
- 632 **Kubát Z, Zlůvová J, Vogel I, Kováčová V, Cermák T, Cegan R, Hobza R, Vyskot B,**  
633 **Kejnovský E. 2014.** Possible mechanisms responsible for absence of a retrotransposon family  
634 on a plant Y chromosome. *New Phytologist* **202**: 662–678.
- 635 **Kuzminov A. 2016.** Chromosomal replication complexity: a novel DNA metrics and genome  
636 instability factor. *PLOS Genetics* **12**: e1006229.
- 637 **Li W. 1997.** The study of correlation structures of DNA sequences: a critical review. *Computers*  
638 *& Chemistry* **21**: 257–271.
- 639 **Macas J, Koblížková A, Navrátilová A, Neumann P. 2009.** Hypervariable 3' UTR region of  
640 plant LTR-retrotransposons as a source of novel satellite repeats. *Gene* **448**: 198–206.
- 641 **Macas J, Mészáros T, Nouzová M. 2002.** PlantSat: a specialized database for plant satellite  
642 repeats. *Bioinformatics* **18**: 28–35.
- 643 **Macas J, Navrátilová A, Koblížková A. 2006.** Sequence homogenization and chromosomal  
644 localization of VicTR-B satellites differ between closely related *Vicia* species. *Chromosoma* **115**:  
645 437–47.
- 646 **Macas J, Navrátilová A, Mészáros T. 2003.** Sequence subfamilies of satellite repeats related to  
647 rDNA intergenic spacer are differentially amplified on *Vicia sativa* chromosomes. *Chromosoma*  
648 **112**: 152–8.
- 649 **Macas J, Neumann P. 2007.** Ogre elements - a distinct group of plant Ty3/gypsy-like  
650 retrotransposons. *Gene* **390**: 108–16.
- 651 **Macas J, Neumann P, Navrátilová A. 2007.** Repetitive DNA in the pea (*Pisum sativum* L.)  
652 genome: comprehensive characterization using 454 sequencing and comparison to soybean and  
653 *Medicago truncatula*. *BMC Genomics* **8**: 427.
- 654 **Macas J, Novák P, Pellicer J, Čížková J, Koblížková A, Neumann P, Fuková I, Doležel J,**  
655 **Kelly LJ, Leitch IJ. 2015.** In depth characterization of repetitive DNA in 23 plant genomes  
656 reveals sources of genome size variation in the legume tribe *Fabeae*. *PLoS ONE* **10**: e0143424.
- 657 **McMurry TL, Politis DN. 2010.** Banded and tapered estimates for autocovariance matrices and  
658 the linear process bootstrap. *Journal of Time Series Analysis* **31**: 471–482.
- 659 **Meštrović N, Mravinac B, Pavlek M, Vojvoda-Zeljko T, Šatović E, Plohl M. 2015.** Structural  
660 and functional liaisons between transposable elements and satellite DNAs. *Chromosome*  
661 *Research* **23**: 583–596.
- 662 **Metzker ML. 2009.** Sequencing technologies - the next generation. *Nature Reviews Genetics*  
663 **11**: 31–46.

- 664 **Mitsuhashi S, Frith MC, Mizuguchi T, Miyatake S, Toyota T, Adachi H, Oma Y, Kino Y,**  
665 **Mitsuhashi H, Matsumoto N. 2019.** Tandem-genotypes: robust detection of tandem repeat  
666 expansions from long DNA reads. *Genome Biology* **20**: 58.
- 667 **Murray MG, Thompson WF. 1980.** Rapid isolation of high molecular weight plant DNA.  
668 *Nucleic Acids Research* **8**: 4321–4326.
- 669 **Navrátilová A, Koblížková A, Macas J. 2008.** Survey of extrachromosomal circular DNA  
670 derived from plant satellite repeats. *BMC Plant Biology* **8**: 90.
- 671 **Neumann P, Koblížková A, Navrátilová A, Macas J. 2006.** Significant expansion of *Vicia*  
672 *pannonica* genome size mediated by amplification of a single type of giant retroelement.  
673 *Genetics* **173**: 1047–56.
- 674 **Neumann P, Novák P, Hošťáková N, Macas J. 2019.** Systematic survey of plant LTR-  
675 retrotransposons elucidates phylogenetic relationships of their polyprotein domains and provides  
676 a reference for element classification. *Mobile DNA* **10**: 1.
- 677 **Neumann P, Pavlíková Z, Koblížková A, Fuková I, Jedličková V, Novák P, Macas J. 2015.**  
678 Centromeres off the hook: massive changes in centromere size and structure following  
679 duplication of CenH3 gene in *Fabeae* species. *Molecular Biology and Evolution* **32**: 1862–1879.
- 680 **Neumann P, Schubert V, Fuková I, Manning JE, Houben A, Macas J. 2016.** Epigenetic  
681 histone marks of extended meta-polycentric centromeres of *Lathyrus* and *Pisum* chromosomes.  
682 *Frontiers in Plant Science* **7**: 234.
- 683 **Novák P, Ávila Robledillo L, Koblížková A, Vrbová I, Neumann P, Macas J. 2017.**  
684 TAREAN: a computational tool for identification and characterization of satellite DNA from  
685 unassembled short reads. *Nucleic Acids Research* **45**: e111.
- 686 **Novák P, Neumann P, Macas J. 2010.** Graph-based clustering and characterization of repetitive  
687 sequences in next-generation sequencing data. *BMC Bioinformatics* **11**: 378.
- 688 **Peona V, Weissensteiner MH, Suh A. 2018.** How complete are ‘complete’ genome assemblies?  
689 - An avian perspective. *Molecular Ecology Resources* **18**: 1188–1195.
- 690 **Plohl M, Meštrović N, Mravinac B. 2014.** Centromere identity from the DNA point of view.  
691 *Chromosoma* **123**: 313–325.
- 692 **Roeck A De, Coster W De, Bossaerts L, Cacace R, Pooter T De, Dongen J Van, D’Hert S,**  
693 **Rijk P De, Strazisar M, Broeckhoven C Van, et al. 2018.** Accurate characterization of  
694 expanded tandem repeat length and sequence through whole genome long-read sequencing on  
695 PromethION. *bioRxiv*: 439026.
- 696 **Ruiz-Ruano FJ, López-León MD, Cabrero J, Camacho JPM. 2016.** High-throughput  
697 analysis of the satellitome illuminates satellite DNA evolution. *Scientific Reports* **6**: 28333.

- 698 **Sharma D, Issac B, Raghava GPS, Ramaswamy R. 2004.** Spectral Repeat Finder (SRF):  
699 identification of repetitive sequences using Fourier transformation. *Bioinformatics* **20**: 1405–  
700 1412.
- 701 **Smith GP. 1976.** Evolution of repeated DNA sequences by unequal crossover. *Science* **191**:  
702 528–535.
- 703 **Sonnhammer EL, Durbin R. 1995.** A dot-matrix program with dynamic threshold control  
704 suited for genomic DNA and protein sequence analysis. *Gene* **167**: GC1-10.
- 705 **Stephan W. 1986.** Recombination and the evolution of satellite DNA. *Genetical Research* **47**:  
706 167–174.
- 707 **Stephan W, Cho S. 1994.** Possible role of natural selection in the formation of tandem-  
708 repetitive noncoding DNA. *Genetics* **136**: 333–341.
- 709 **Thorvaldsdóttir H, Robinson JT, Mesirov JP. 2013.** Integrative Genomics Viewer (IGV):  
710 High-performance genomics data visualization and exploration. *Briefings in Bioinformatics* **14**:  
711 178–192.
- 712 **Valeri MP, Dias GB, Pereira V do S, Campos Silva Kuhn G, Svartman M. 2018.** An  
713 eutherian intronic sequence gave rise to a major satellite DNA in Platyrrhini. *Biology Letters* **14**:  
714 20170686.
- 715 **Venables WN, Ripley BD. 2002.** *Modern Applied Statistics with S*. Springer.
- 716 **Vershinin A V., Heslop-Harrison JS. 1998.** Comparative analysis of the nucleosomal structure  
717 of rye, wheat and their relatives. *Plant Molecular Biology* **36**: 149–161.
- 718 **Vyskot B, Hobza R. 2015.** The genomics of plant sex chromosomes. *Plant Science* **236**: 126–  
719 135.
- 720 **Walsh JB. 1987.** Persistence of tandem arrays: implications for satellite and simple-sequence  
721 DNAs. *Genetics* **115**: 553–567.
- 722 **Weiss-Schneeweiss H, Leitch AR, McCann J, Jang T-S, Macas J. 2015.** Employing next  
723 generation sequencing to explore the repeat landscape of the plant genome. In: Hörandl E,  
724 Appelhans M, eds. Next Generation Sequencing in Plant Systematics. *Regnum Vegetabile* 157.  
725 Königstein, Germany: Koeltz Scientific Books, 155–179.
- 726 **Weissensteiner MH, Pang AWC, Bunikis I, Höijer I, Vinnere-Petterson O, Suh A, Wolf  
727 JBW. 2017.** Combination of short-read, long-read, and optical mapping assemblies reveals  
728 large-scale tandem repeat arrays with population genetic implications. *Genome Research* **27**:  
729 697–708.
- 730

## 731 **Figure legends**

732 **Figure 1. Schematic representation of the analysis strategy.** (A) Nanopore read (gray bar)  
733 containing arrays of satellites A (orange) and B (green). The orientations of the arrays with  
734 respect to sequences in the reference database are indicated. (B) LASTZ search against the  
735 reference database results in similarity hits (displayed as arrows showing their orientation, with  
736 colors distinguishing satellite sequences) that are quality-filtered to remove non-specific hits  
737 (C). The filtered hits are used to identify the satellite arrays as regions of specified minimal  
738 length that are covered by overlapping hits to the same repeat (D). The positions of these regions  
739 are recorded in the form of coded reads where the sequences are replaced by satellite codes and  
740 array orientations are distinguished using uppercase and lowercase characters (E). The coded  
741 reads are then used for various downstream analyses. (F) Array lengths are extracted and  
742 analyzed regardless of orientation of the arrays but while distinguishing the complete and  
743 truncated arrays (here it is shown for satellite A). (G) Analysis of the sequences adjacent to the  
744 satellite arrays includes 10 kb regions upstream (-) and downstream (+) of the array. This  
745 analysis is performed with respect to the array orientation (compare the positions of upstream  
746 and downstream regions for arrays in forward (A1, A3) versus reverse orientation (A2)).

747 **Figure 2. Length distributions of the satellite repeat arrays.** The lengths of the arrays  
748 detected in the nanopore reads are displayed as weighted histograms with a bin size of 5 kb; the  
749 last bin includes all arrays longer than 120 kb. The arrays that were completely embedded within  
750 the reads (red bars) are distinguished from those that were truncated by their positions at the  
751 ends of the reads (blue bars). Due to the array truncation, the latter values are actually  
752 underestimations of the real lengths of the corresponding genomic arrays and should be  
753 considered as lower bounds of the respective array lengths.

754 **Figure 3. Sequence composition of the genomic regions adjacent to the satellite repeat**  
755 **arrays.** The plots show the proportions of repetitive sequences identified within 10 kb regions  
756 upstream (positions -1 to -10,000) and downstream (1 to 10,000) of the arrays of individual  
757 satellites (the array positions are marked by vertical lines, and the plots are related to the  
758 forward-oriented arrays). Only the repeats detected in proportions exceeding 0.05 are plotted  
759 (colored lines). The black lines represent the same satellite as examined.

760 **Figure 4. Detection of the OGRE sequences coding for the retrotransposon conserved protein**  
761 **domains in the genomic regions adjacent to the satellite repeat arrays.** (A) The plots show  
762 the proportions of similarity hits from the individual domains and their orientation with respect

763 to the forward-oriented satellite arrays. **(B)** A schematic representation of the Ogre element with  
764 the positions of the protein domains and short tandem repeats downstream of the coding region.

765 **Figure 5. Periodicity spectra revealed by the fast Fourier transform analysis of the satellite**  
766 **repeat arrays.** Each spectrum is an average of the spectra calculated for the individual arrays  
767 longer than 30kb of the same satellite family or subfamily. The numbers of arrays used for the  
768 calculations are in parentheses. The peaks corresponding to the monomer lengths listed in Table  
769 1 are marked with red asterisks. The peaks in the FabTR-2 spectrum corresponding to higher-  
770 order repeats are indicated by the horizontal line.

771 **Figure 6. Distribution of the satellite repeats on the metaphase chromosomes of *L. sativus***  
772 **(2n = 14).** **(A-F)** The satellites were visualized using multi-color FISH, with individual probes  
773 labeled as indicated by the color-coded descriptions. The chromosomes counterstained with  
774 DAPI are shown in gray. The numbers in panel **(C)** correspond to the individual chromosomes  
775 that were distinguished using the hybridization patterns of the FabTR-54 sequences. This  
776 satellite was then used for chromosome discrimination in combination with other probes. **(G-I)**  
777 Simultaneous detection of the Ogre integrase probe (INT) and the satellite FabTR-52 subfamily  
778 A demonstrates the different distribution of these sequences in the genome. The probe signals  
779 and DAPI counterstaining are shown as separate grayscale images **(G-I)** and a merged image  
780 **(J)**. The arrows point to the primary constrictions of chromosomes 7.



781 **Table 1.** Characteristics of the investigated satellite repeats

| Satellite family<br><br><i>Subfamily</i> | Monomer<br>[bp] | AT [%] | Genomic<br>abundance |          | FISH probe    |
|------------------------------------------|-----------------|--------|----------------------|----------|---------------|
|                                          |                 |        | [%]                  | [Mbp/1C] |               |
| <b>FabTR-2</b>                           | 49              | 71.4   | 1.700                | 110.8    | LASm3H1       |
| <b>FabTR-51</b>                          |                 |        | 3.101                | 202.2    |               |
| <i>FabTR-51-LAS-A</i>                    | 80              | 46.3   | 2.500                | 163.0    | LASm1H1       |
| <i>FabTR-51-LAS-B</i>                    | 79              | 51.9   | 0.560                | 36.5     | LasTR6_H1     |
| <i>FabTR-51-LAS-C</i>                    | 118             | 50.0   | 0.041                | 2.7      |               |
| <b>FabTR-52</b>                          |                 |        | 2.019                | 131.6    |               |
| <i>FabTR-52-LAS-A</i>                    | 55              | 47.3   | 2.000                | 130.4    | LASm2H1       |
| <i>FabTR-52-LAS-B</i>                    | 32              | 50.0   | 0.019                | 1.2      |               |
| <b>FabTR-53</b>                          |                 |        | 2.600                | 169.5    | c1644 + c1645 |
| <i>FabTR-53-LAS-A</i>                    | 660             | 76.6   | n.d.                 |          |               |
| <i>FabTR-53-LAS-B</i>                    | 368             | 76.4   | n.d.                 |          |               |
| <i>FabTR-53-LAS-C</i>                    | 565             | 75.9   | n.d.                 |          |               |
| <b>FabTR-54</b>                          | 104             | 51.0   | 0.840                | 54.8     | LasTR5_H1     |
| <b>FabTR-55</b>                          | 78              | 55.1   | 0.480                | 31.3     | LasTR7_H1     |
| <b>FabTR-56</b>                          | 46              | 60.9   | 0.250                | 16.3     | LasTR8_H1     |
| <b>FabTR-57</b>                          | 61              | 65.6   | 0.130                | 8.5      | LasTR9_H1     |
| <b>FabTR-58</b>                          | 86              | 59.3   | 0.140                | 9.1      | LasTR10_H1    |
| <b>FabTR-59</b>                          | 131             | 49.6   | 0.110                | 7.2      | LasTR11_H1    |
| <b>FabTR-60</b>                          | 86              | 52.3   | 0.110                | 7.2      | LasTR12_H1    |

## Figure 1

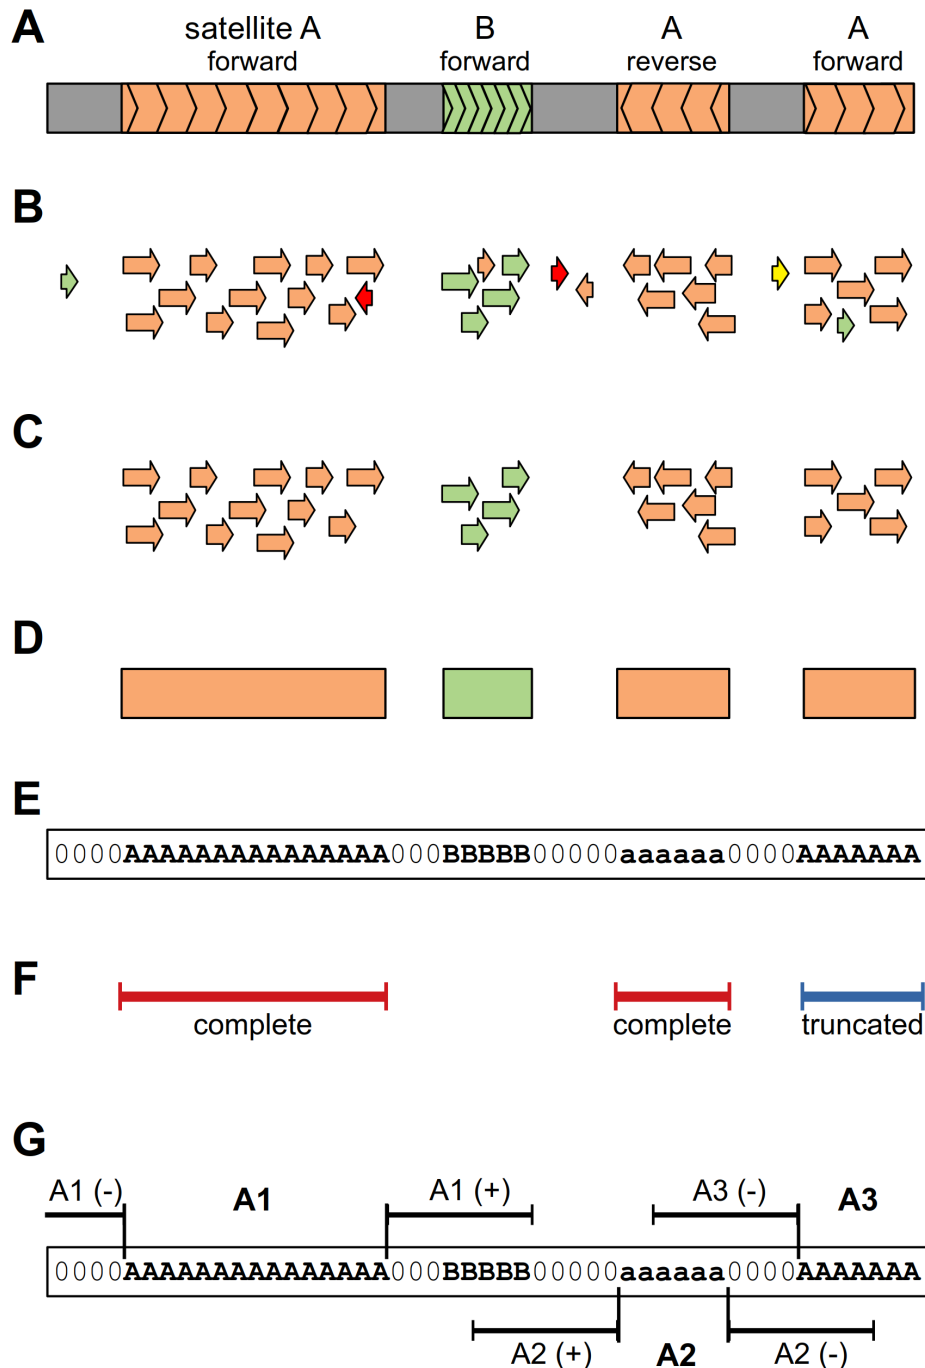

**Figure 1. Schematic representation of the analysis strategy.** (A) Nanopore read (gray bar) containing arrays of satellites A (orange) and B (green). The orientations of the arrays with respect to sequences in the reference database are indicated. (B) LASTZ search against the reference database results in similarity hits (displayed as arrows showing their orientation, with colors distinguishing satellite sequences) that are quality-filtered to remove non-specific hits (C). The filtered hits are used to identify the satellite arrays as regions of specified minimal length that are covered by overlapping hits to the same repeat (D). The positions of these regions are recorded in the form of coded reads where the sequences are replaced by satellite codes and array orientations are distinguished using uppercase and lowercase characters (E). The coded reads are then used for various downstream analyses. (F) Array lengths are extracted and analyzed regardless of orientation of the arrays but while distinguishing the complete and truncated arrays (here it is shown for satellite A). (G) Analysis of the sequences adjacent to the satellite arrays includes 10 kb regions upstream (-) and downstream (+) of the array. This analysis is performed with respect to the array orientation (compare the positions of upstream and downstream regions for arrays in forward (A1, A3) versus reverse orientation (A2)).



## Figure 2

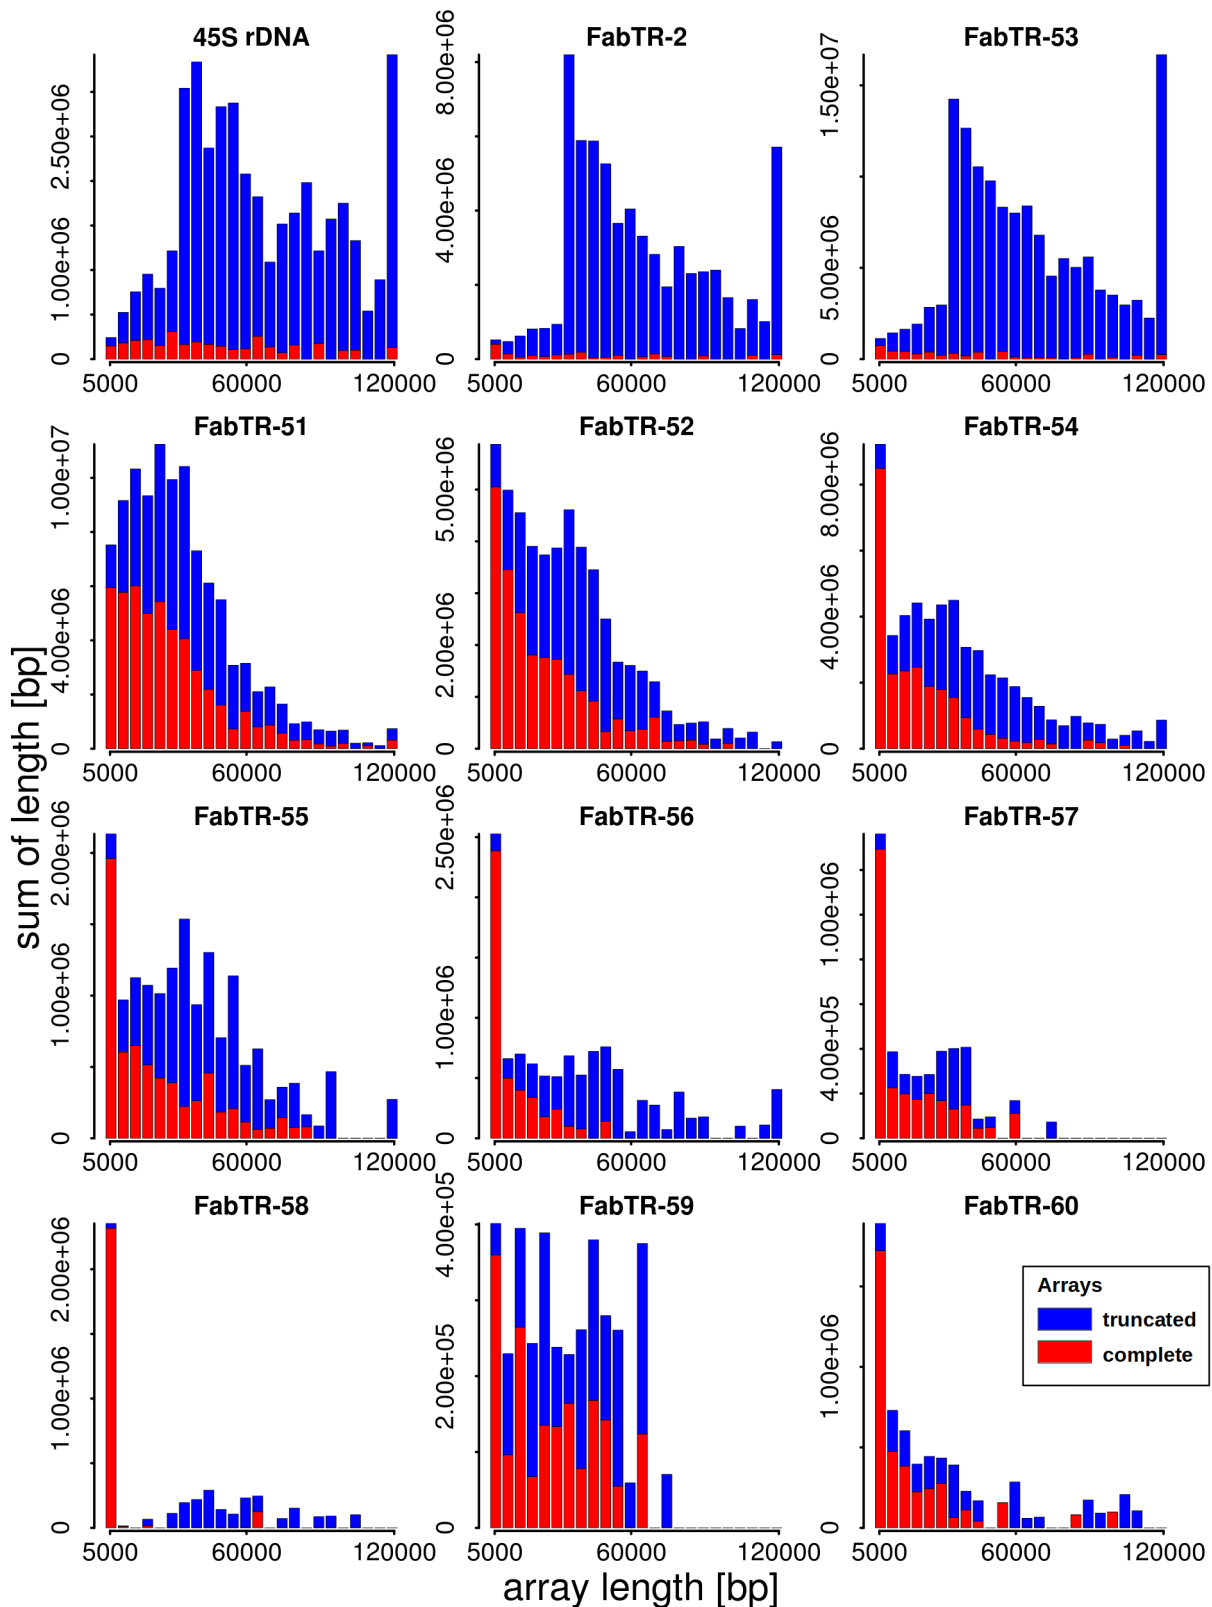

**Figure 2. Length distributions of the satellite repeat arrays.** The lengths of the arrays detected in the nanopore reads are displayed as weighted histograms with a bin size of 5 kb; the last bin includes all arrays longer than 120 kb. The arrays that were completely embedded within the reads (red bars) are distinguished from those that were truncated by their positions at the ends of the reads (blue bars). Due to the array truncation, the latter values are actually underestimations of the real lengths of the corresponding genomic arrays and should be considered as lower bounds of the respective array lengths.

### Figure 3

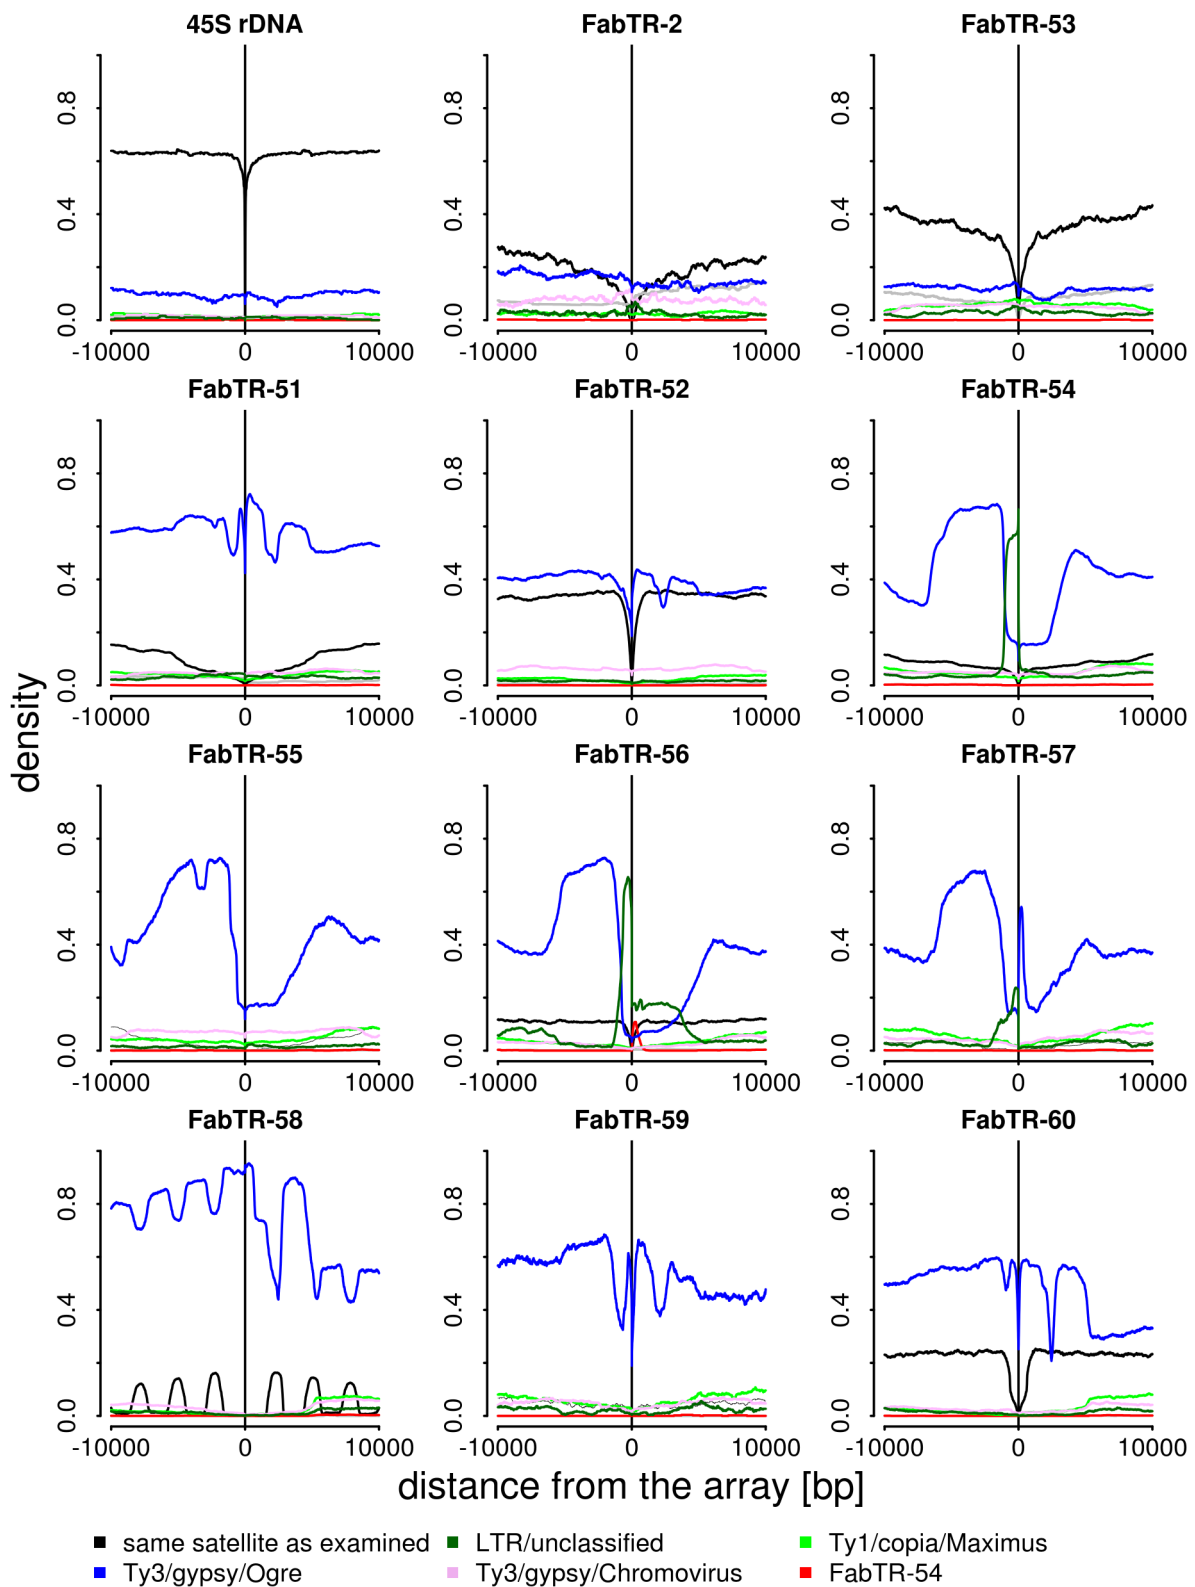

**Figure 3. Sequence composition of the genomic regions adjacent to the satellite repeat arrays.** The plots show the proportions of repetitive sequences identified within 10 kb regions upstream (positions -1 to -10,000) and downstream (1 to 10,000) of the arrays of individual satellites (the array positions are marked by vertical lines, and the plots are related to the forward-oriented arrays). Only the repeats detected in proportions exceeding 0.05 are plotted (colored lines). The black lines represent the same satellite as examined.

## Figure 4

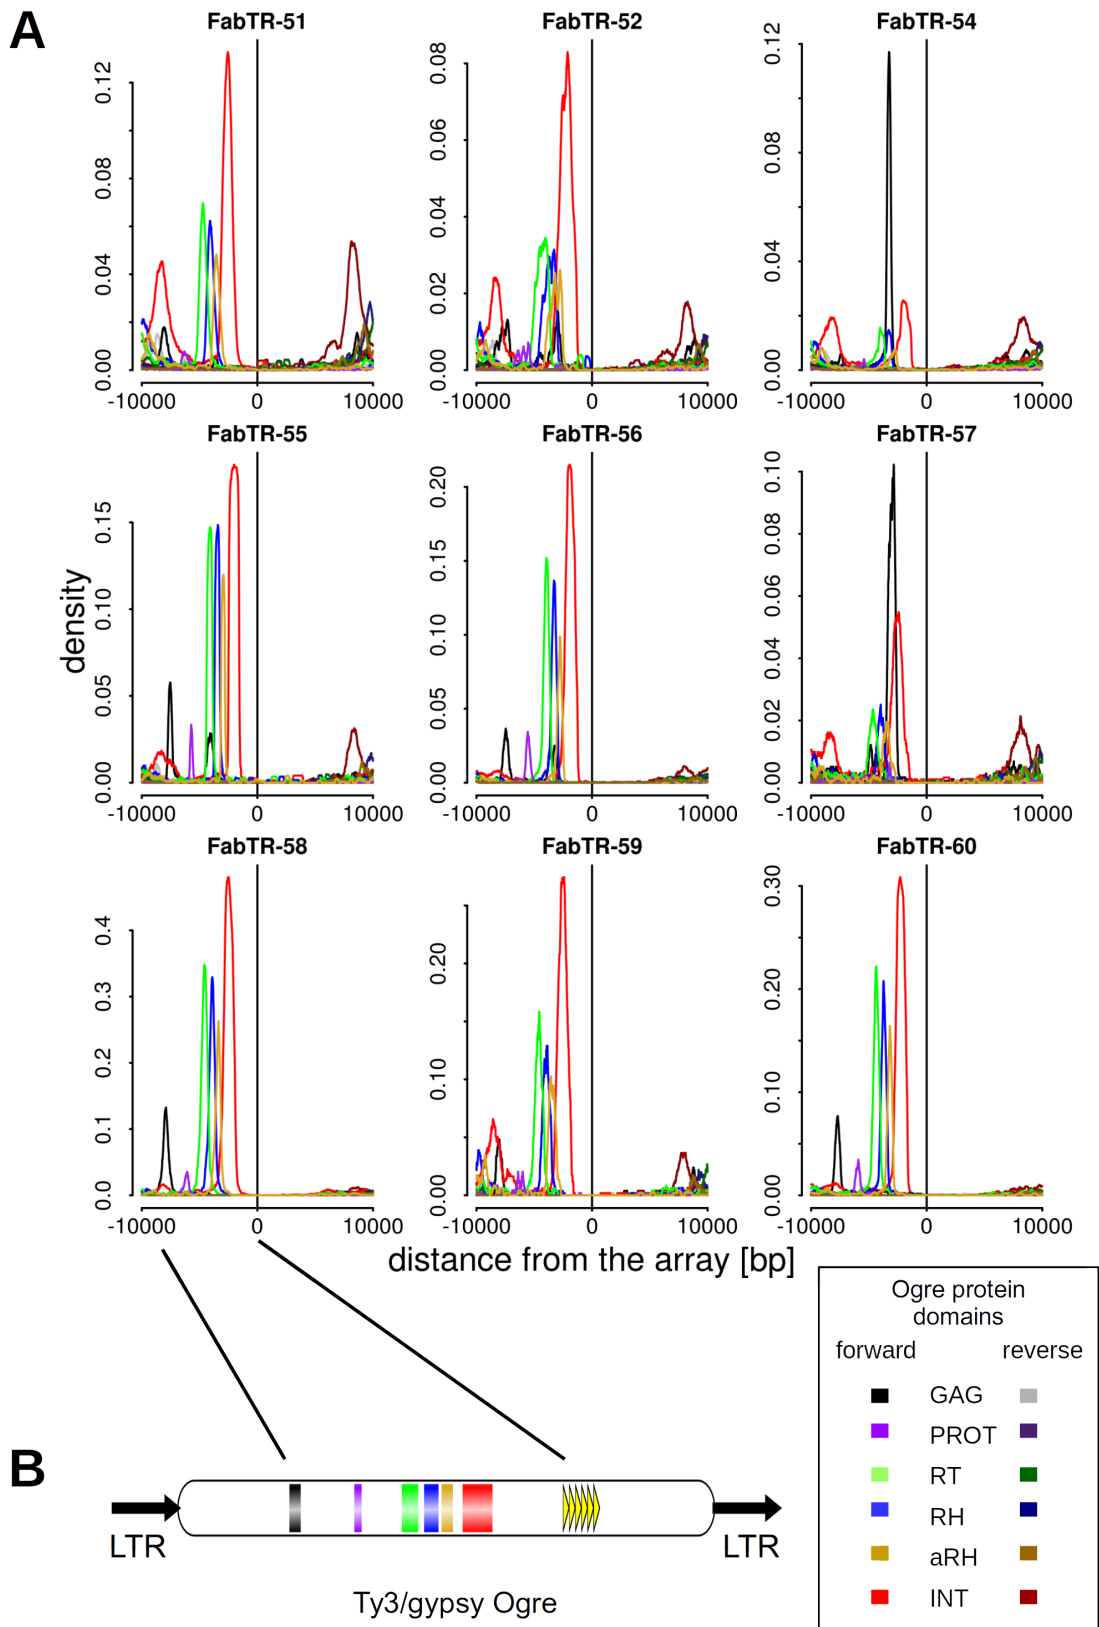

**Figure 4. Detection of the Oge sequences coding for the retrotransposon conserved protein domains in the genomic regions adjacent to the satellite repeat arrays. (A)** The plots show the proportions of similarity hits from the individual domains and their orientation with respect to the forward-oriented satellite arrays. **(B)** A schematic representation of the Oge element with the positions of the protein domains and short tandem repeats downstream of the coding region.

## Figure 5

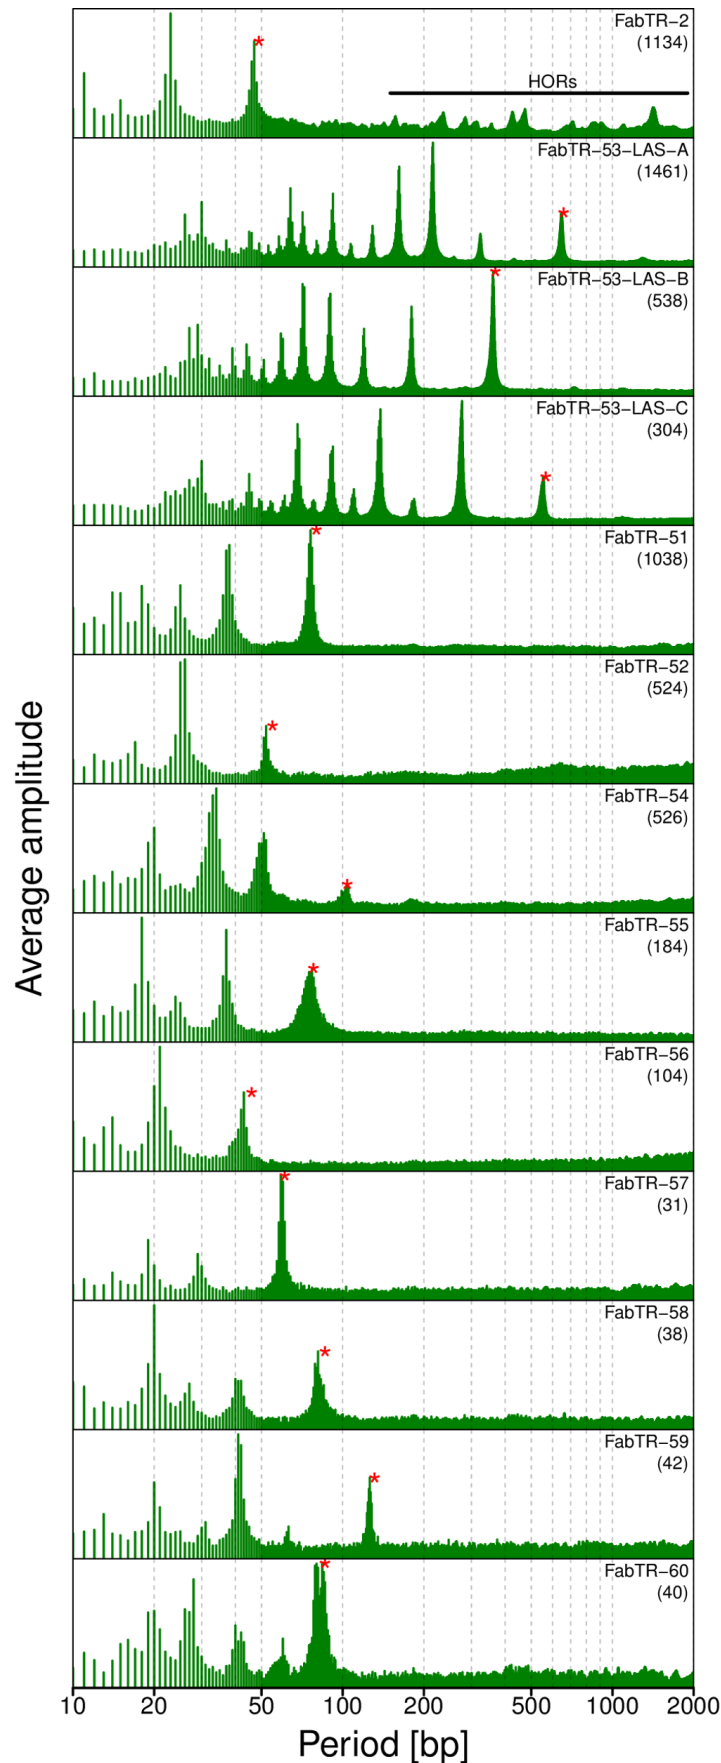

**Figure 5. Periodicity spectra revealed by the fast Fourier transform analysis of the satellite repeat arrays.** Each spectrum is an average of the spectra calculated for the individual arrays longer than 30kb of the same satellite family or subfamily. The numbers of arrays used for the calculations are in parentheses. The peaks corresponding to the monomer lengths listed in Table 1 are marked with red asterisks. The peaks in the FabTR-2 spectrum corresponding to higher-order repeats are indicated by the horizontal line.

## Figure 6

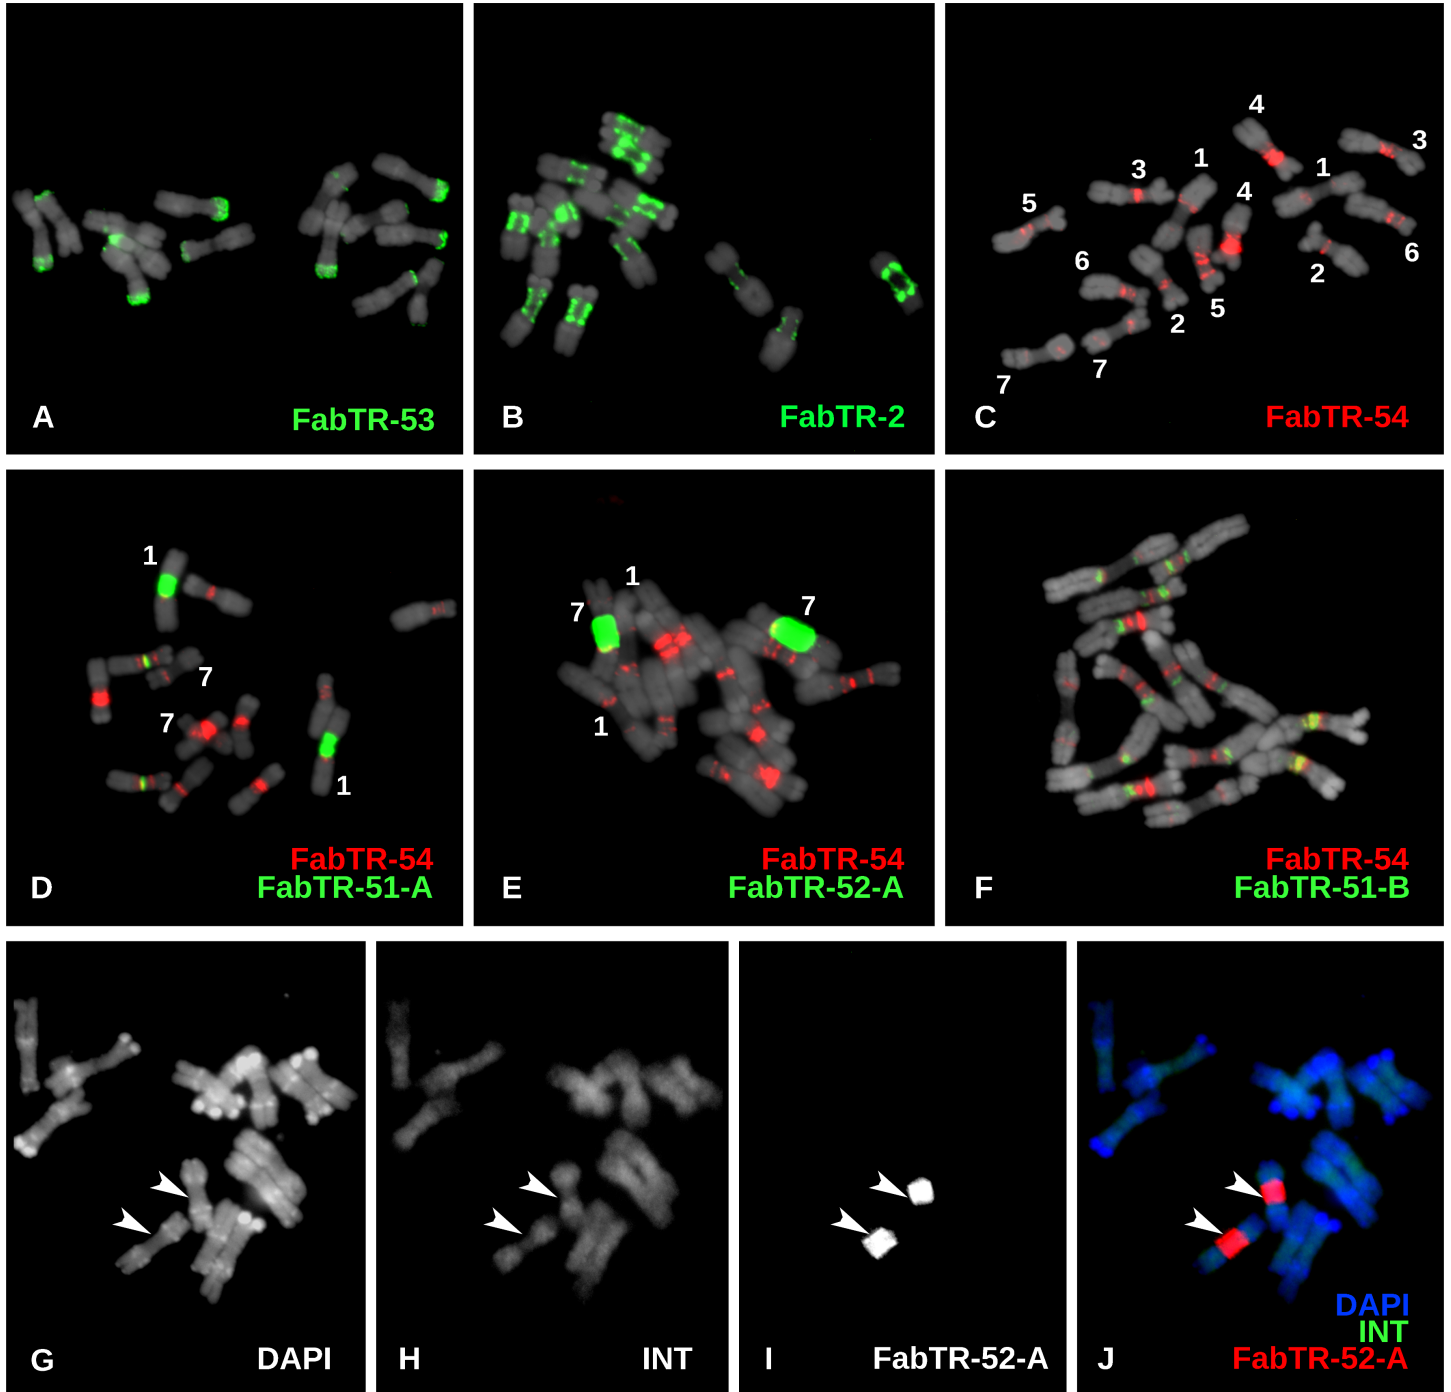

**Figure 6. Distribution of the satellite repeats on the metaphase chromosomes of *L. sativus* (2n = 14).** (A-F) The satellites were visualized using multi-color FISH, with individual probes labeled as indicated by the color-coded descriptions. The chromosomes counterstained with DAPI are shown in gray. The numbers in panel (C) correspond to the individual chromosomes that were distinguished using the hybridization patterns of the FabTR-54 sequences. This satellite was then used for chromosome discrimination in combination with other probes. (G-I) Simultaneous detection of the Ogre integrase probe (INT) and the satellite FabTR-52 subfamily A demonstrates the different distribution of these sequences in the genome. The probe signals and DAPI counterstaining are shown as separate grayscale images (G-I) and a merged image (J). The arrows point to the primary constrictions of chromosomes 7.

## Supplementary Fig. S1

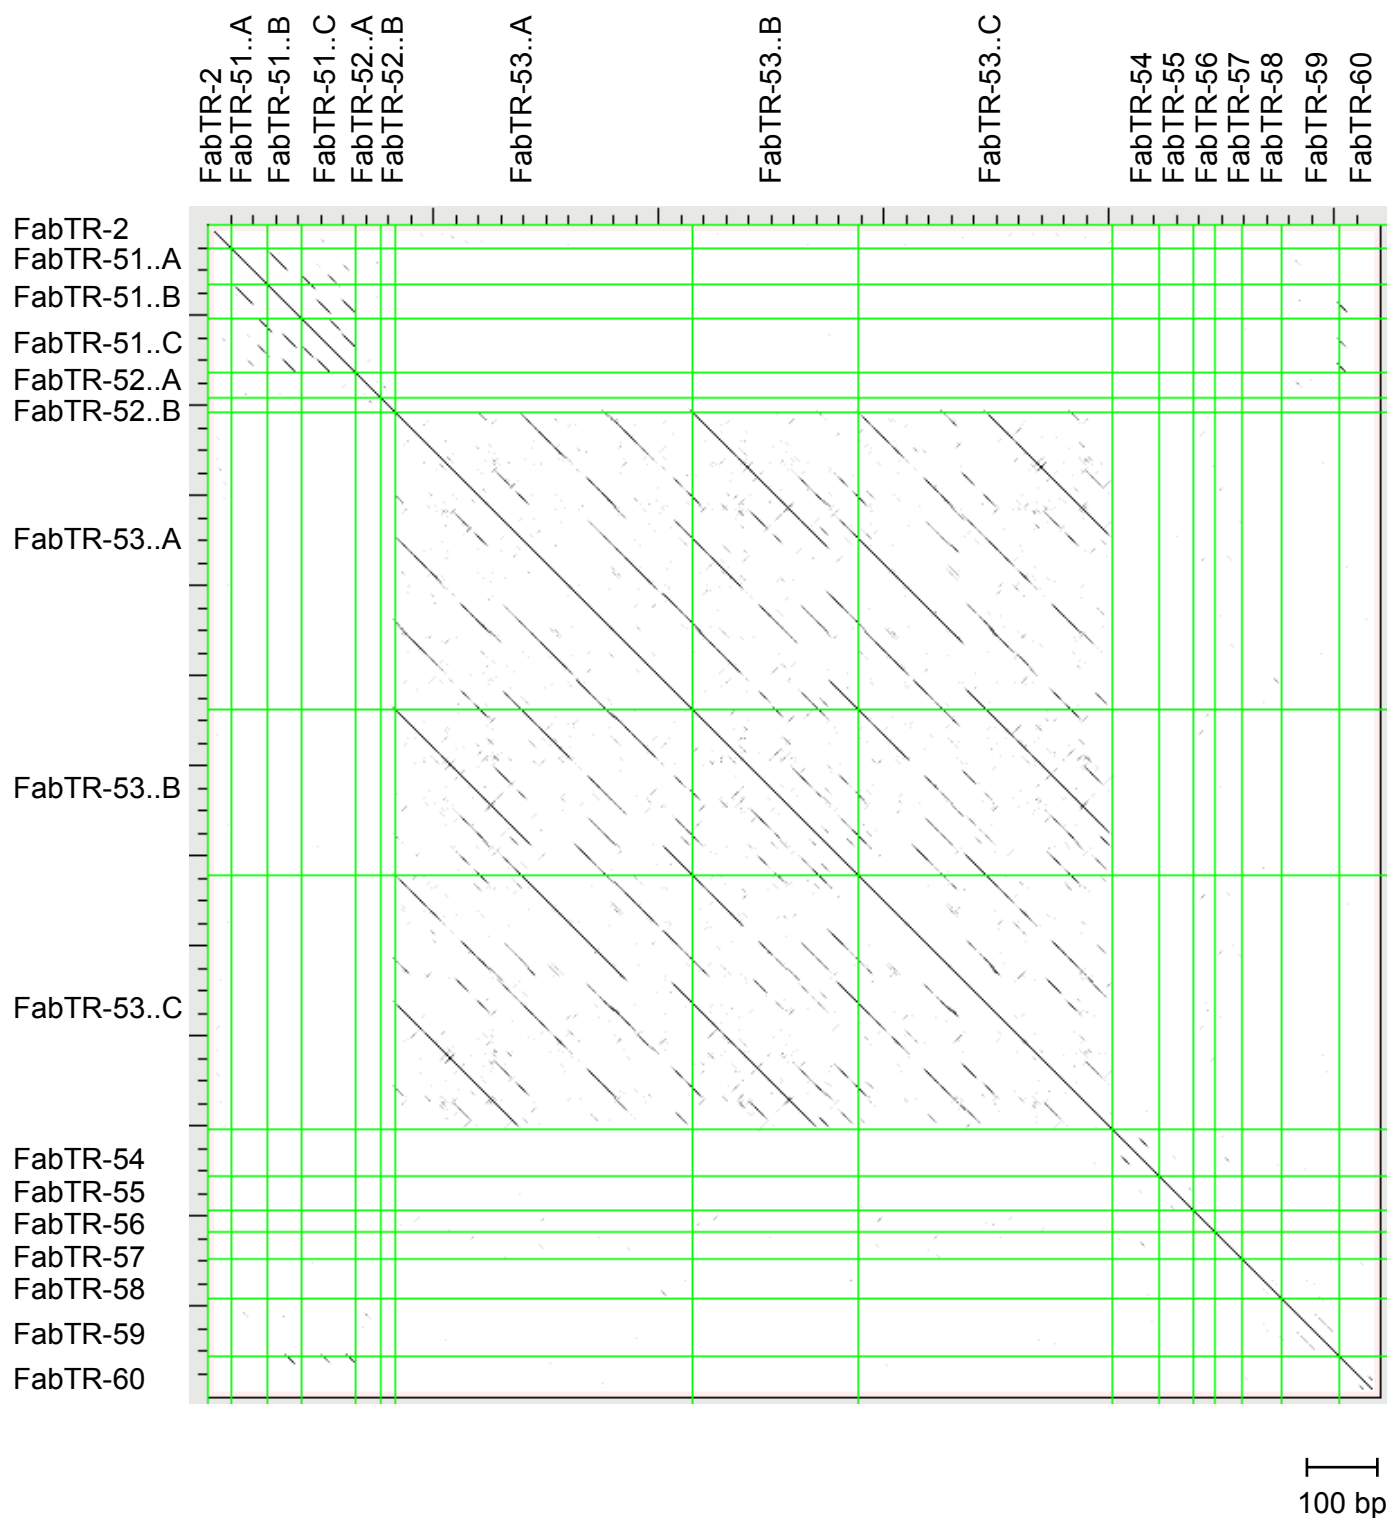

**Supplementary Fig. S1.** Dot-plot sequence similarity comparison of consensus monomer sequences. The sequences are separated by green lines and their similarities exceeding 40% over a 100 bp sliding window are displayed as black dots or diagonal lines.

## Supplementary Fig. S2

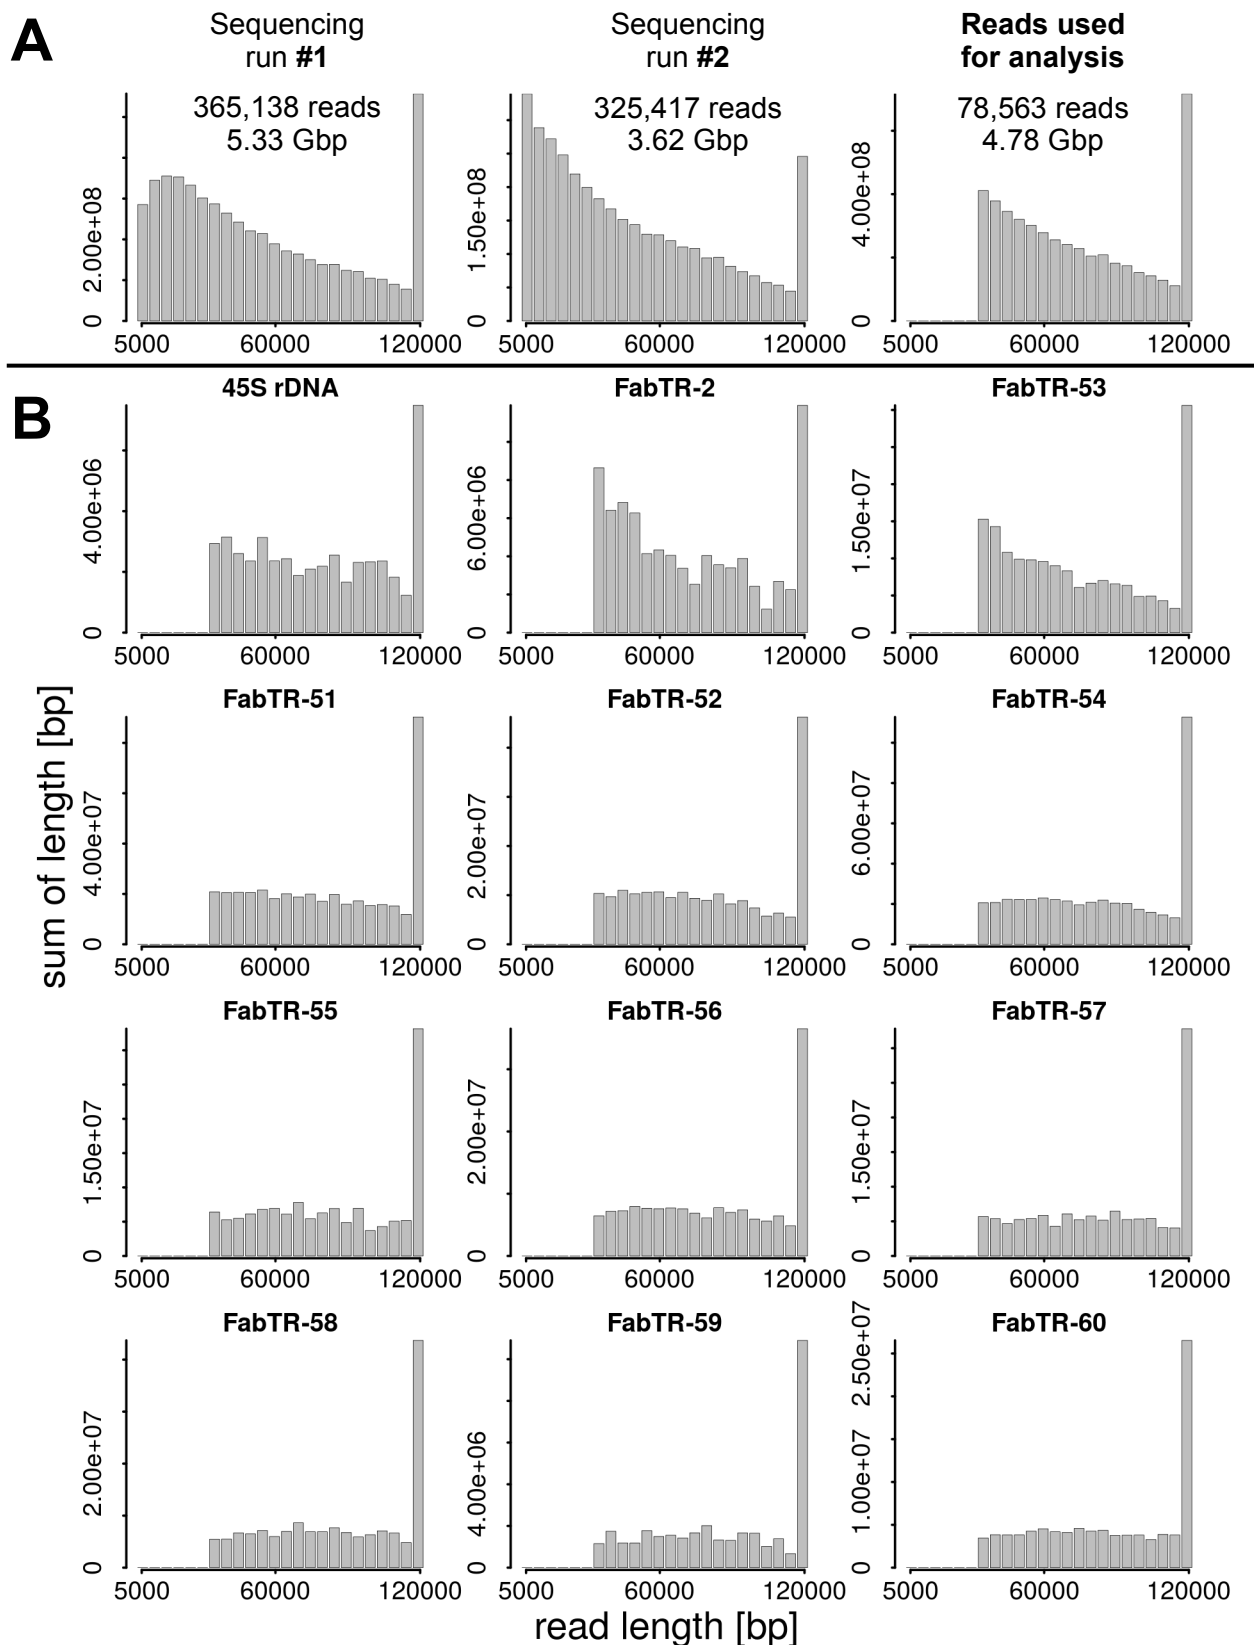

**Supplementary Fig. S2.** Length distributions of nanopore reads displayed as weighted histograms with bin size of 5 kb, with the last bin including all reads longer than 120 kb. (A) Length distributions of raw reads from two sequencing runs and the final set of quality-filtered and size-selected (>30kb) reads used for analysis. (B) Length distributions of nanopore reads containing rDNA and satellite repeats.

### Supplementary Fig. S3

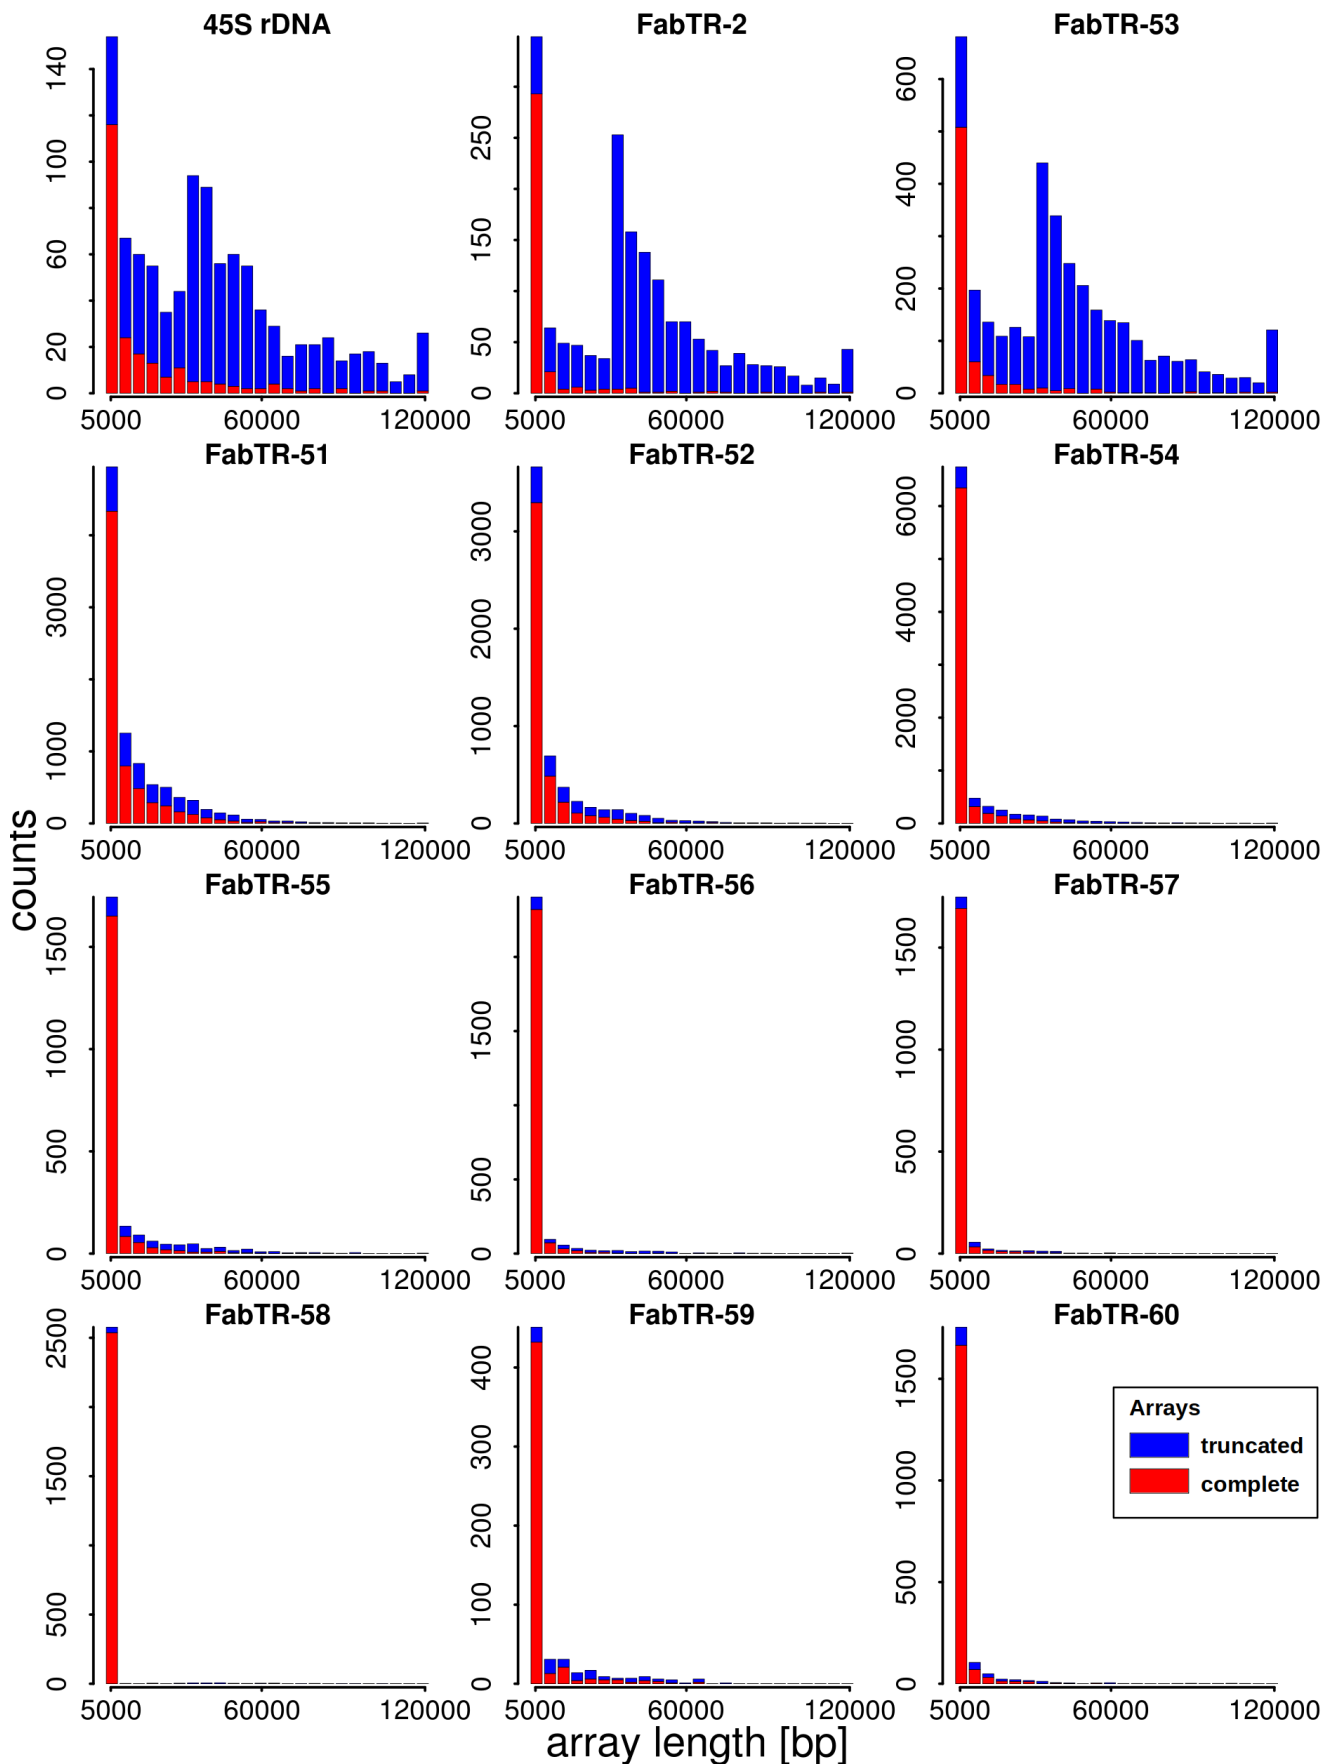

**Supplementary Fig. S3.** Length distributions of satellite repeat arrays displayed as histograms with bin size of 5 kb, with the last bin including all arrays longer than 120 kb. Arrays which were completely embedded within the reads (red bars) are distinguished from those truncated due to their positions at the ends of the reads (blue bars).



## Supplementary Fig. S4

### FabTR-2

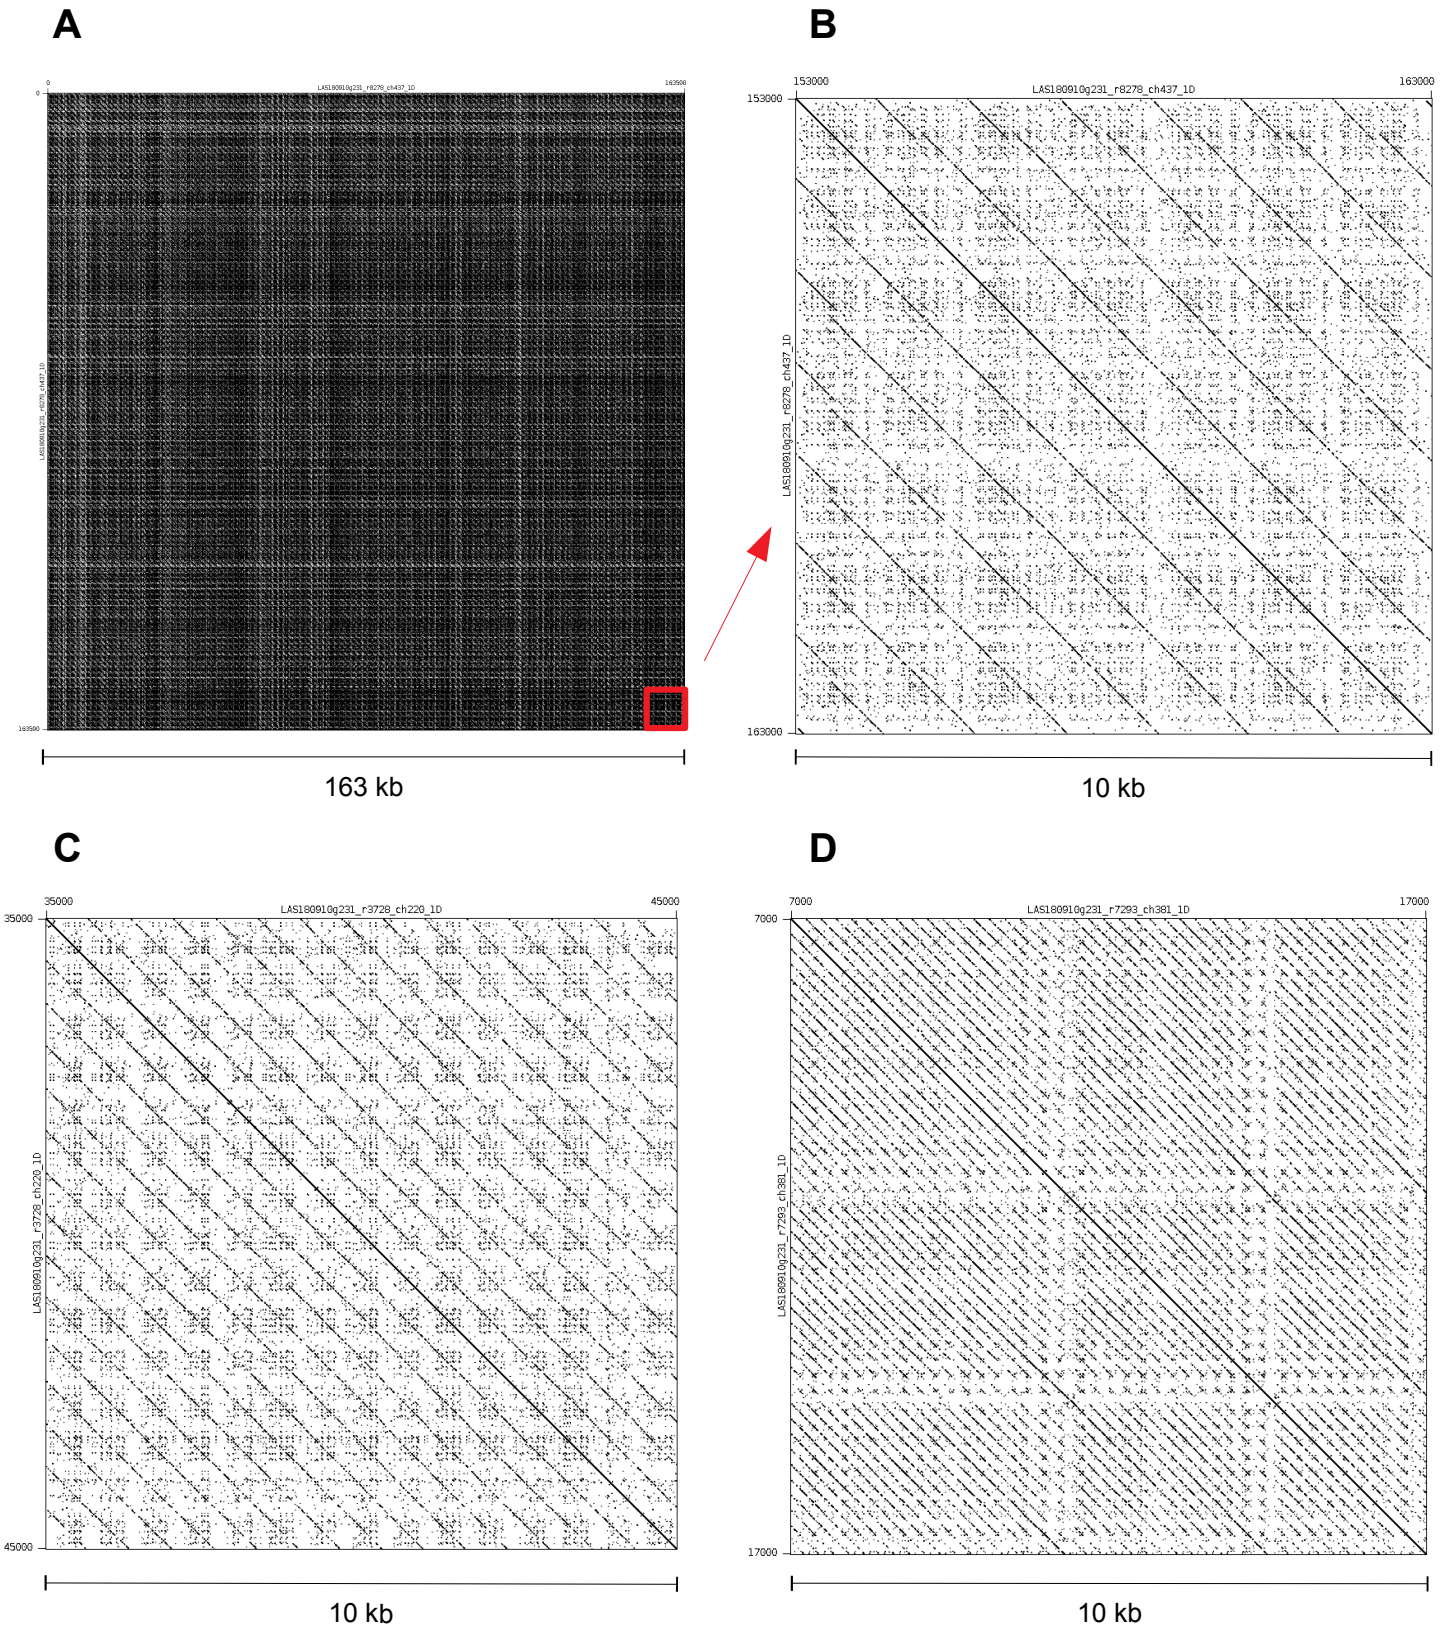

**Supplementary Fig. S4 A-D.** Self-similarity dot-plot visualization of FabTR-2 arrays. Tandem repeats are revealed as diagonal lines with spacing corresponding to monomer length. **(A)** Example of a 163 kb read completely made of FabTR-2 array (the periodicity pattern is obscured by the high density of lines). **(B)** Magnification of the 10 kb region highlighted by a red square on panel A. This array is homogenized as ~1300 bp HOR. **(C,D)** Examples of other FabTR-2 periodicities detected in different reads (only 10 kb regions were used for dot-plots to make periodicity patterns comparable with other plots).

## FabTR-53

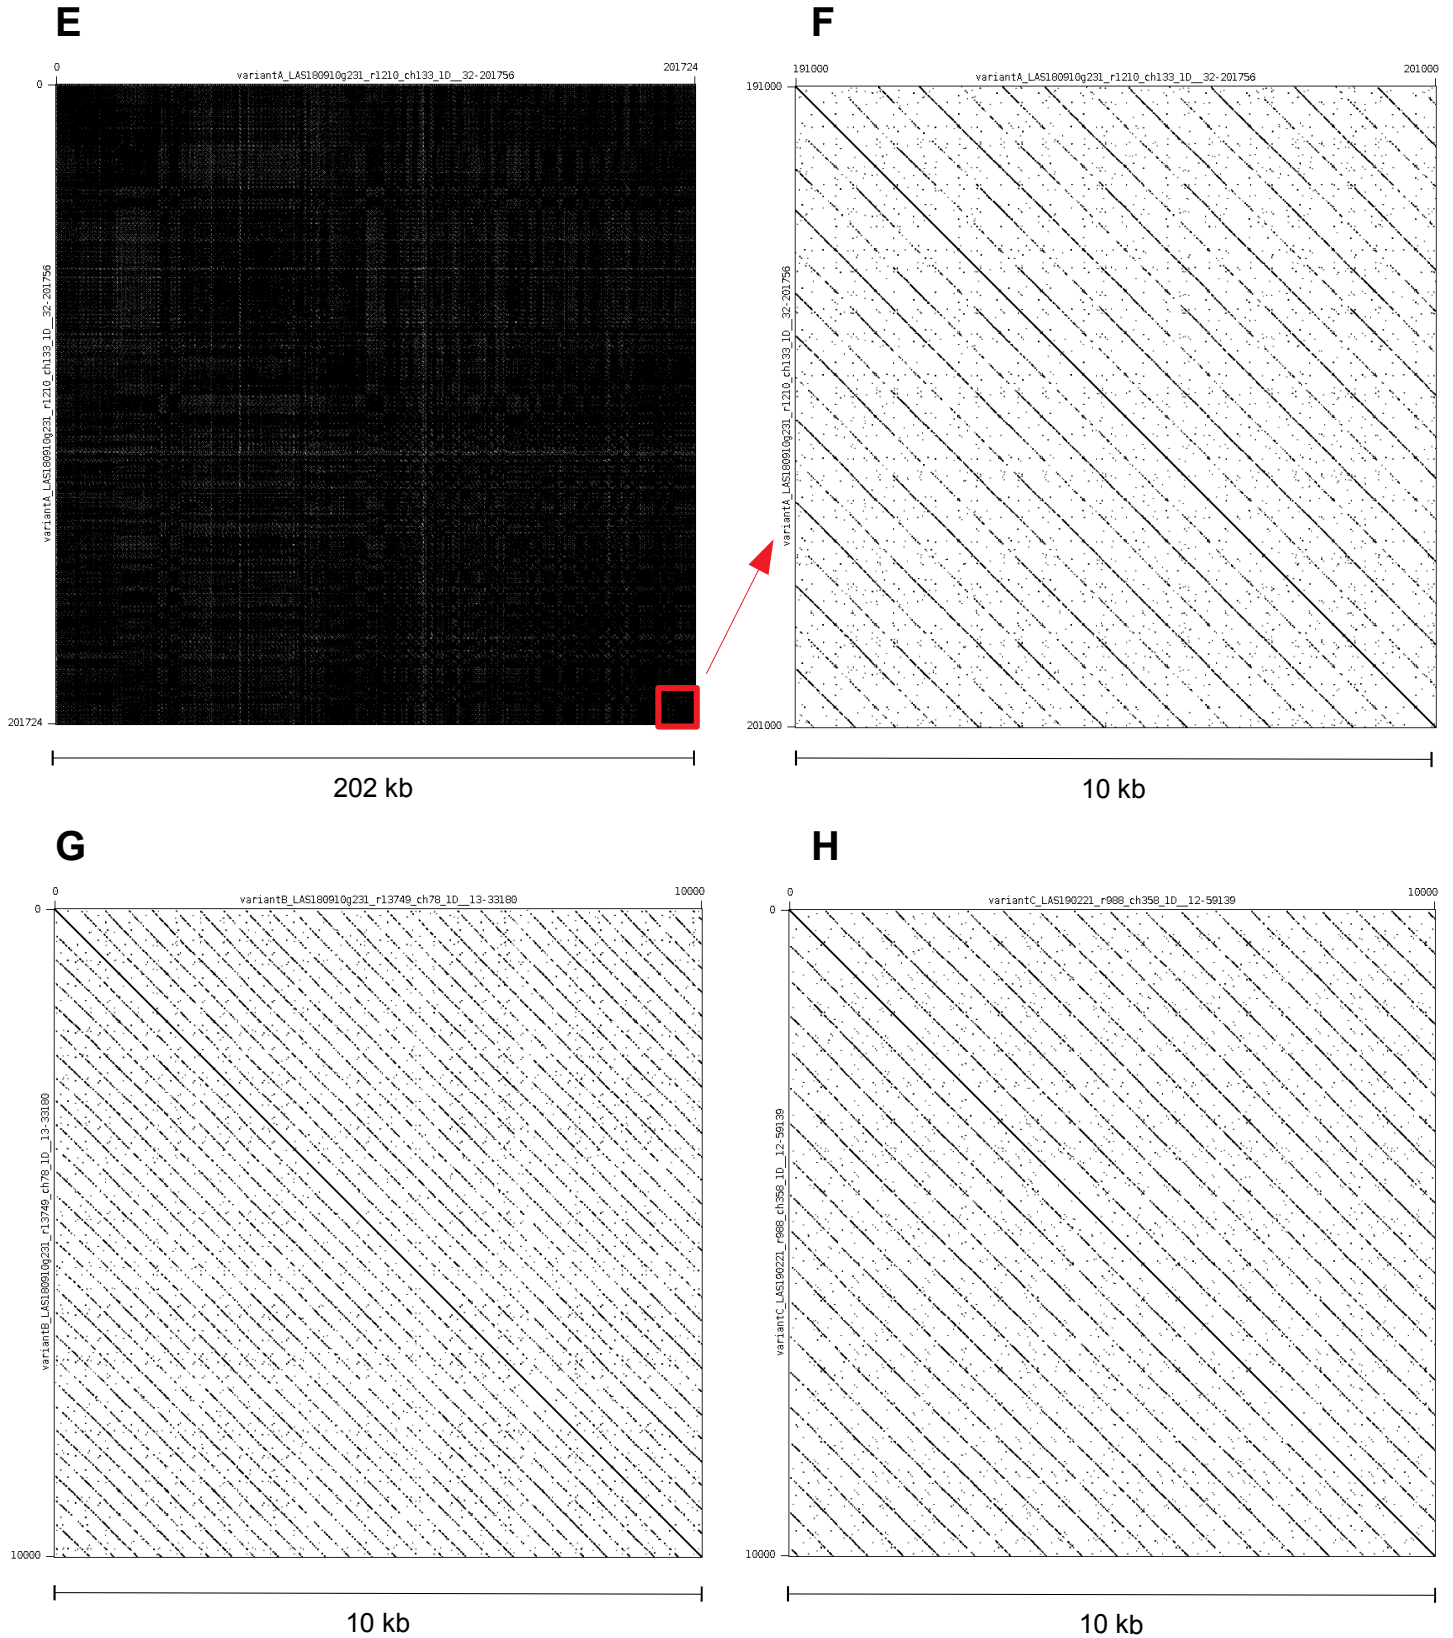

**Supplementary Fig. S4 E-H.** Self-similarity dot-plot visualization of FabTR-53 arrays. **(E)** Example of a 202 kb read completely made of FabTR-2 array (the periodicity pattern is obscured by the high density of lines). **(F)** Magnification of the 10 kb region highlighted by a red square on panel A. **(G,H)** Examples of other FabTR-53 periodicities detected in different reads (only 10 kb regions were used for dot-plots to make periodicity patterns comparable with other plots).



## FabTR-52

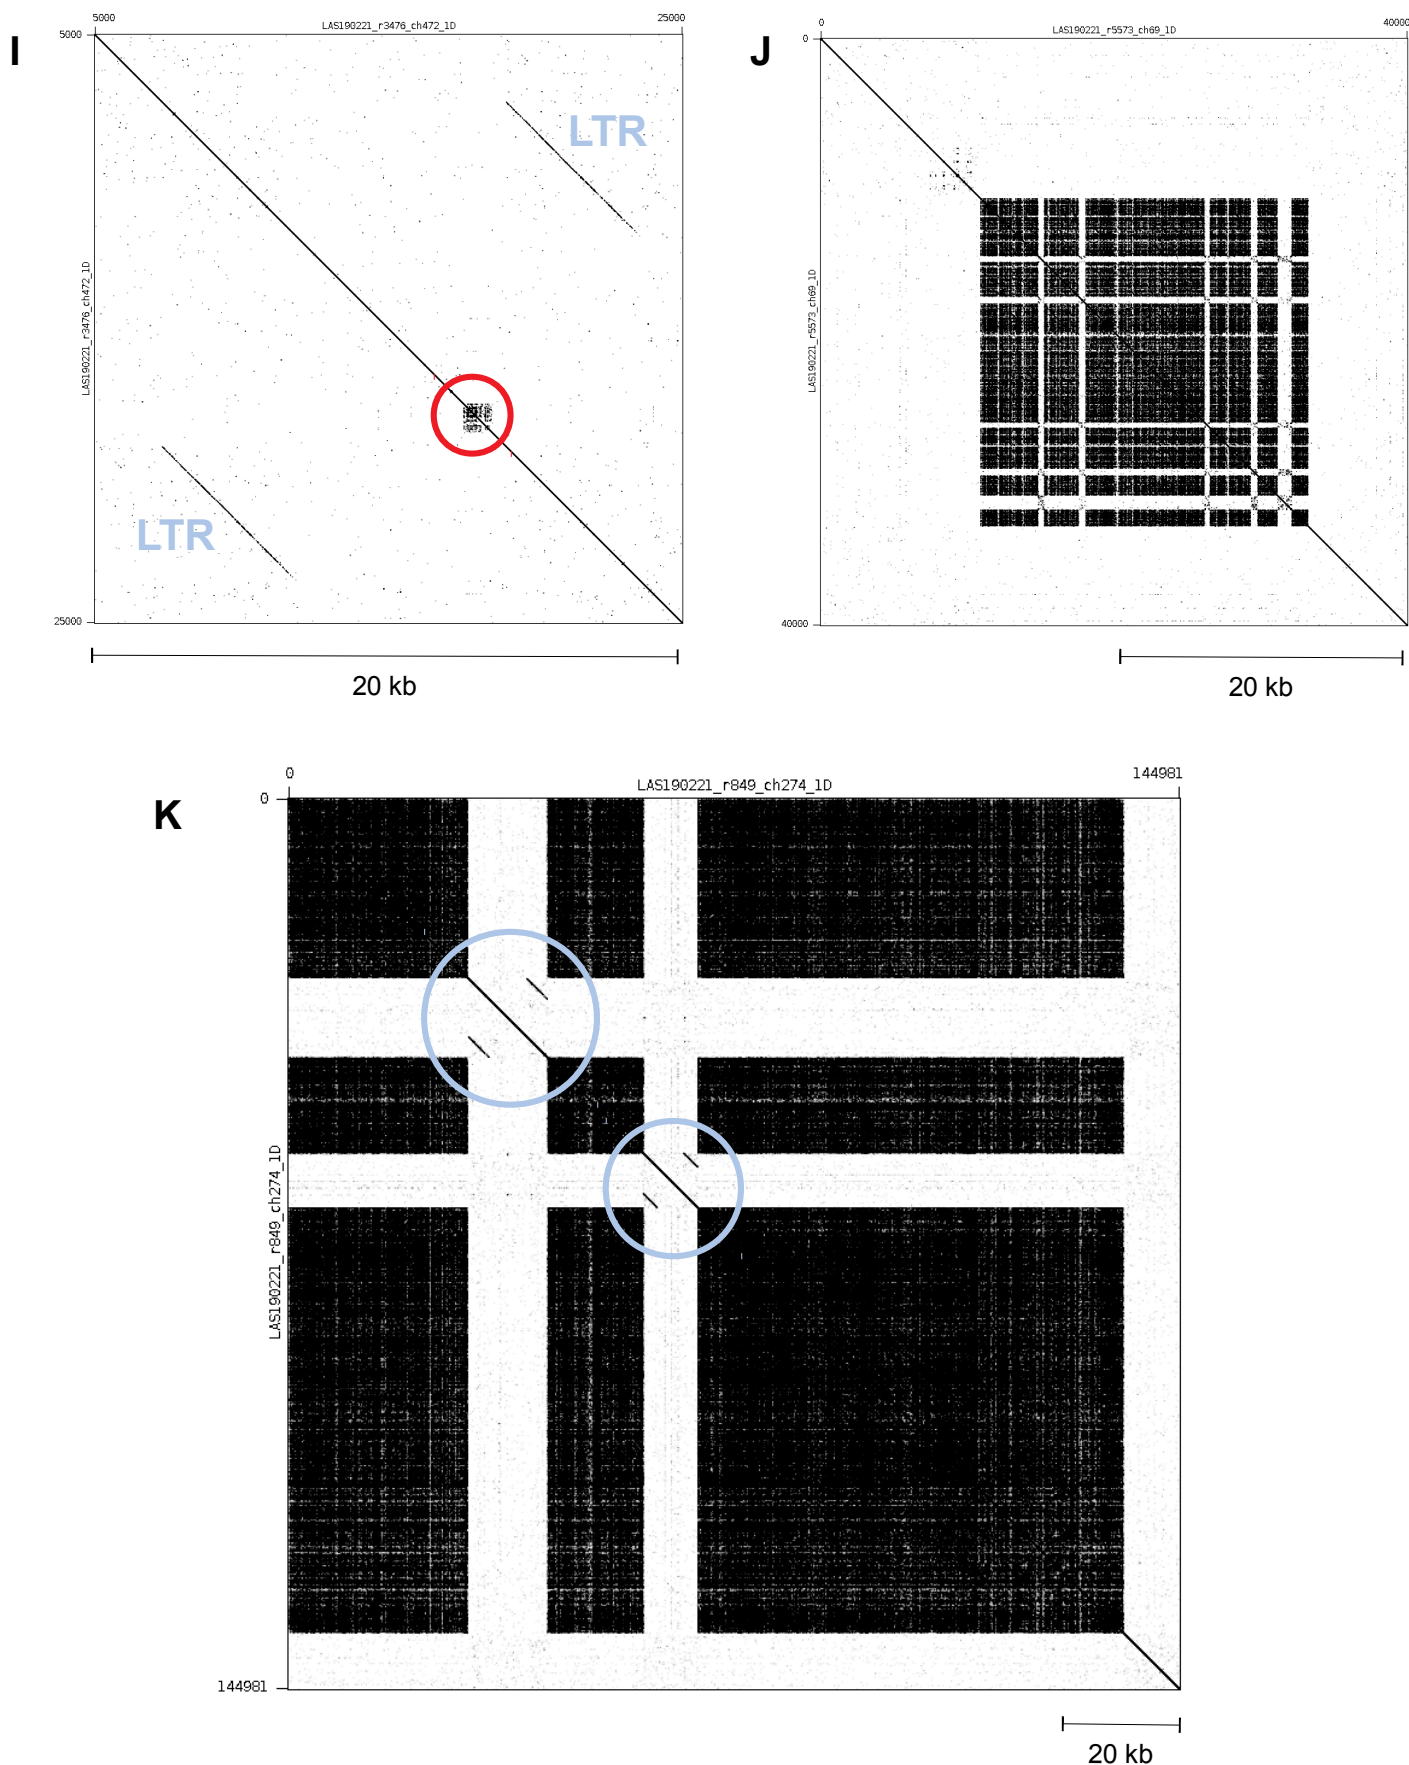

**Supplementary Fig. S4 I-K.** Dot-plots demonstrating length distribution of FabTR-52 arrays, ranging from short arrays (red circle) embedded within LTR-retrotransposon sequences (**I**) and partially expanded arrays (**J**) to the arrays >100 kb in length which are interrupted by insertions of LTR-retrotransposons (blue circles) (**K**).

## FabTR-54

## FabTR-56

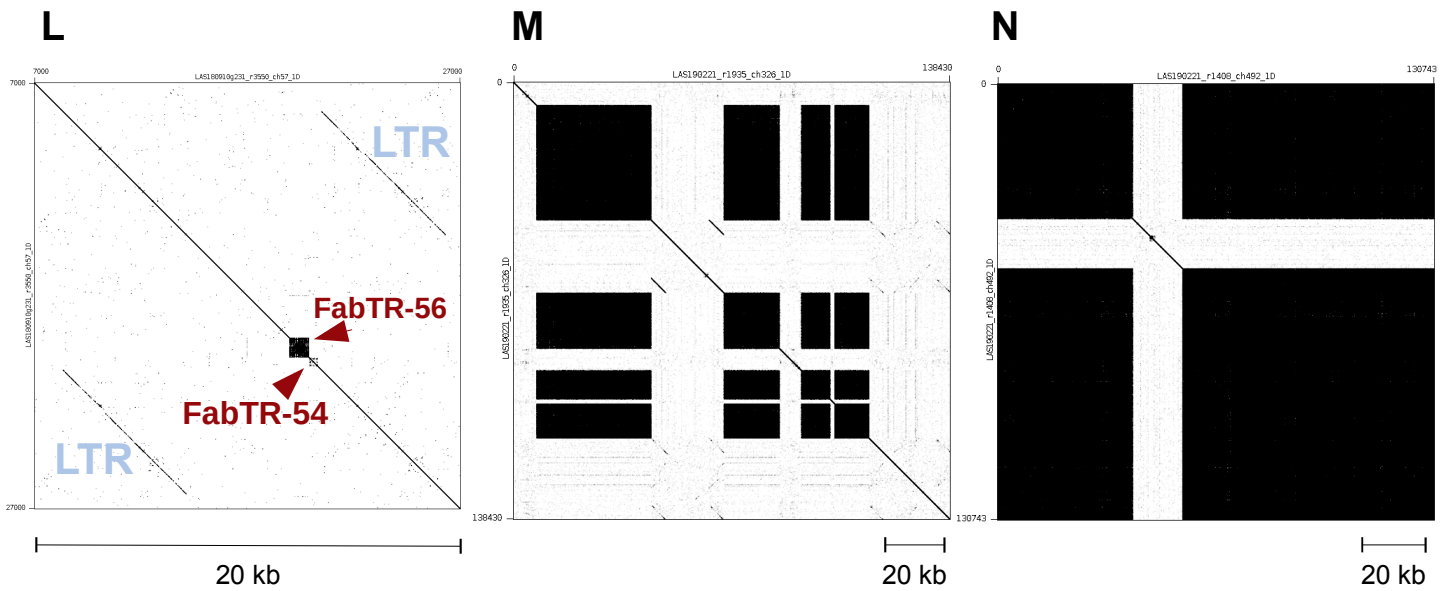

**Supplementary Fig. S4 L-N.** (L) Example of LTR-retrotransposon carrying short FabTR-54 and FabTR-56 arrays. Reads with those tandem repeats expanded to long arrays are shown on panels M (FabTR-54) and N (FabTR-56). The expanded tandem arrays appear as black squares on the dot-plots due to high density of lines.

## FabTR-58

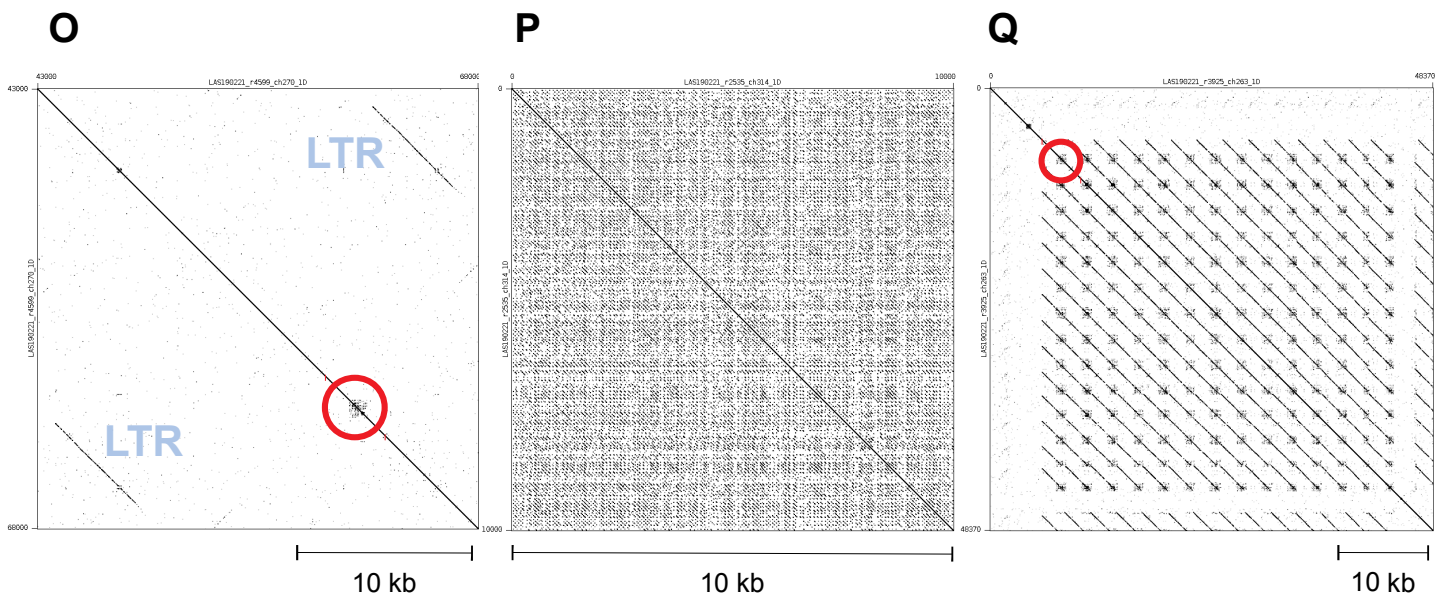

**Supplementary Fig. S4 O-Q.** Three types of genome organization of FabTR-58 repeats: (O) short array (marked by red circle) within LTR-retrotransposon, (P) expanded array, (Q) short arrays embedded within a longer tandem repeat monomer.



## Supplementary Fig. S5

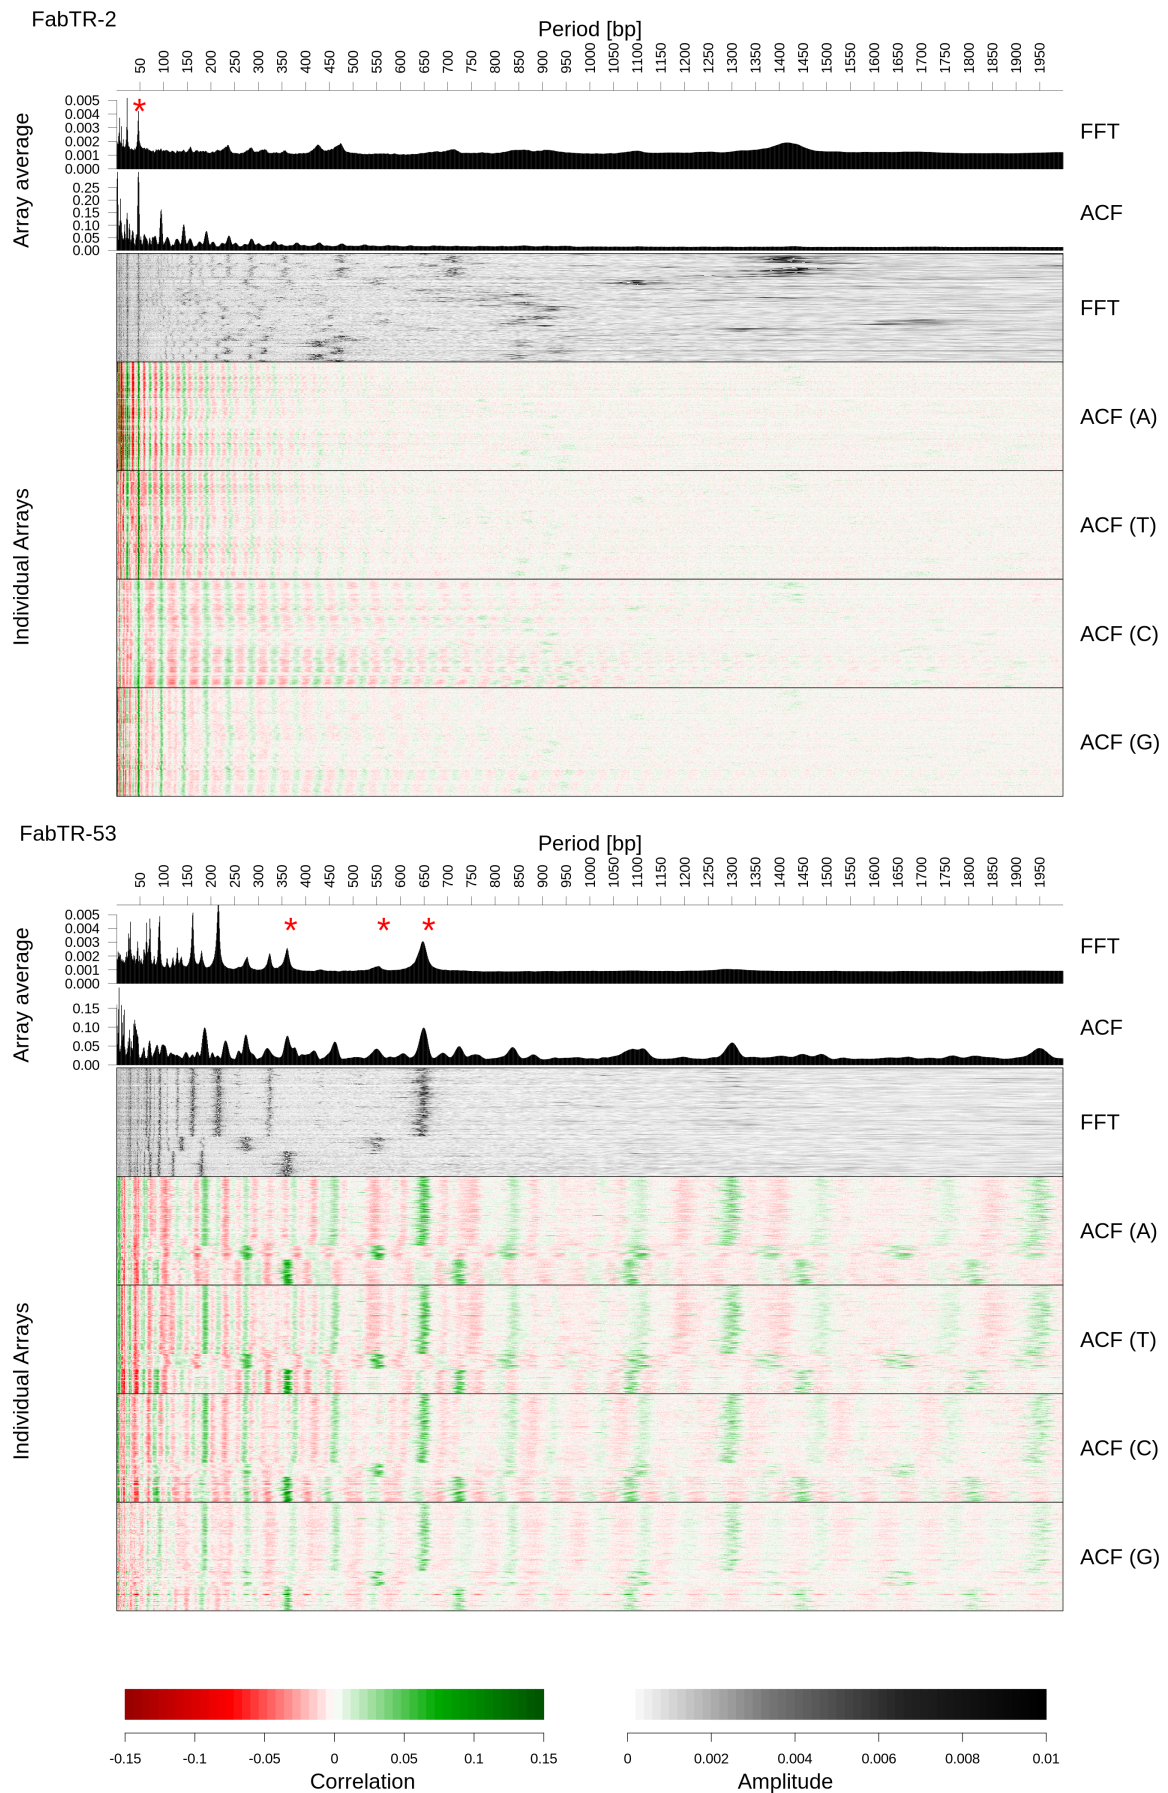

**Supplementary Fig. S5. Detailed periodicity analysis of FabTR-2 and FabTR-53 arrays.** Periodicity analysis using fast Fourier transform (FFT) and autocorrelation function (ACF) are shown as averages of spectra calculated on individual satellite arrays longer than 30 kb. Periodicity spectra from individual arrays are shown as heatmaps with rows corresponding to individual arrays. Autocorrelations are shown separately for individual nucleotides.

## Supplementary Fig. S6

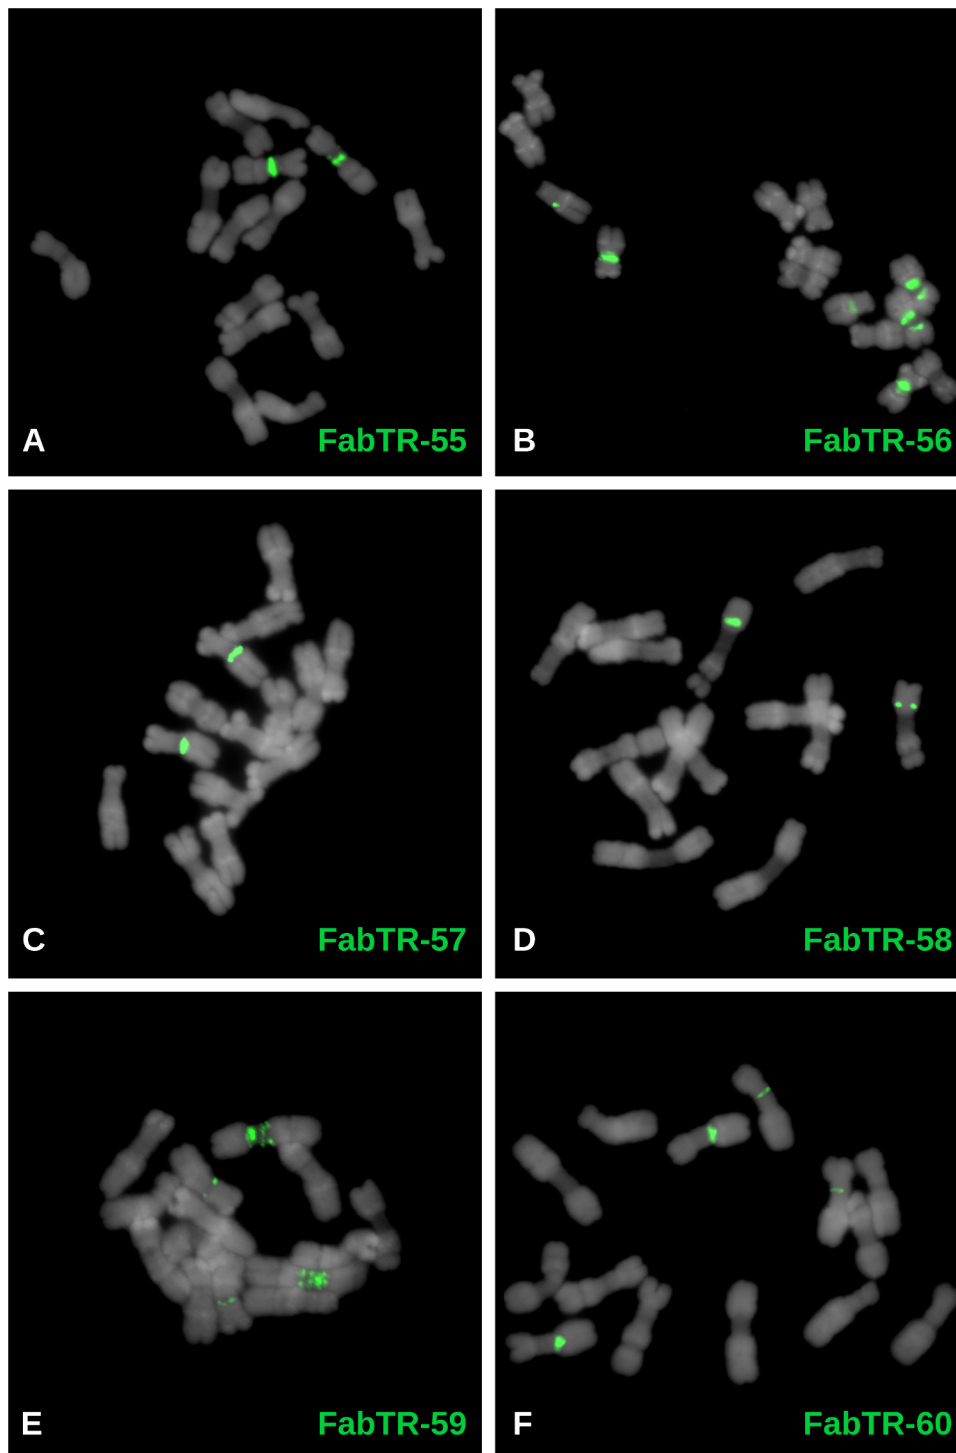

**Supplementary Fig. S6. Distribution of the satellite repeats on the metaphase chromosomes of *L. sativus* ( $2n = 14$ ).** The satellites were visualized using FISH, with individual probes labeled as indicated by the color-coded descriptions. The chromosomes counterstained with DAPI are shown in gray.
